1 **CRUMBLER: A Tool for the Prediction of Ancestry in Cattle**

2

3 Tamar E. Crum<sup>1</sup>, Robert D. Schnabel<sup>1,2</sup>, Jared E. Decker<sup>1,2</sup>, Luciana CA Regitano<sup>3</sup>, and

4

Jeremy F. Taylor<sup>1</sup>

5

6 <sup>1</sup>Division of Animal Sciences, University of Missouri, Columbia, MO, USA 65211

7 <sup>2</sup>Informatics Institute, University of Missouri, Columbia, MO, USA 65211

8 <sup>3</sup>Embrapa Pecuária Sudeste, São Carlos, SP 13560-970, Brazil

9

10

11 Corresponding author: Jeremy F. Taylor. E-mail: [taylorjerr@missouri.edu](mailto:taylorjerr@missouri.edu).

12

13 Short Title: Predicting the Ancestry of Cattle

14

15 E-mail addresses:

16

17 TEC: [tamar.crum@mail.missouri.edu](mailto:tamar.crum@mail.missouri.edu)

18 RDS: [schnabelr@missouri.edu](mailto:schnabelr@missouri.edu)

19 JED: [deckerje@missouri.edu](mailto:deckerje@missouri.edu)

20 LCAR: [luciana.regitano@embrapa.br](mailto:luciana.regitano@embrapa.br)

21 JFT: [taylorjerr@missouri.edu](mailto:taylorjerr@missouri.edu)

22

## 23 **Abstract**

### 24 *Background*

25 In many beef and some dairy production systems, crossbreeding is used to take  
26 advantage of breed complementarity and heterosis. Admixed animals are frequently  
27 identified by their coat color and body conformation phenotypes, however, without  
28 pedigree information it is not possible to identify the expected breed composition of an  
29 admixed animal and in the presence of selection, the actual composition may differ from  
30 expectation. As the roles of DNA and genotype data become more pervasive in animal  
31 agriculture, a systematic method for estimating the breed composition (the proportions  
32 of an animal's genome originating from ancestral pure breeds) has utility for a variety of  
33 downstream analyses including the estimation of genomic breeding values for  
34 crossbred animals, the estimation of quantitative trait locus effects, and heterosis and  
35 heterosis retention in advanced generation composite animals. Currently, there is no  
36 automated or semi-automated ancestry estimation platform for cattle and the objective  
37 of this study was to evaluate the utility of extant public software for ancestry estimation  
38 and determine the effects of reference population size and composition and number of  
39 utilized single nucleotide polymorphism loci on ancestry estimation. We also sought to  
40 develop an analysis pipeline that would simplify this process for members of the  
41 livestock genomics research community.

### 42 *Results*

43 We developed and tested a tool, "CRUMBLER", to estimate the global ancestry of cattle  
44 using ADMIXTURE and SNPweights based on a defined reference panel.  
45 CRUMBLER, was developed and evaluated in cattle, but is a species agnostic pipeline

46 that facilitates the streamlined estimation of breed composition for individuals with  
47 potentially complex ancestries using publicly available global ancestry software and a  
48 specified reference population SNP dataset. We developed the reference panel from a  
49 large cattle genotype data set and breed association pedigree information using  
50 iterative analyses to identify purebred individuals that were representative of each  
51 breed. We also evaluated the numbers of markers necessary for breed composition  
52 estimation and simulated genotypes for advanced generation composite animals to  
53 evaluate the precision of the developed tool.

#### 54 *Conclusion*

55 The developed CRUMBLER pipeline extracts a specified subset of genotypes that is  
56 common to all current commercially available genotyping platforms, processes these  
57 into the file formats required for the analysis software, and predicts admixture  
58 proportions using the specified reference population allele frequencies.

59

## 60 **Background**

61

62 Estimation of the breed composition of individuals with complex ancestries has utility for  
63 estimating breed direct and heterosis effects as well as for the estimation of the additive  
64 genetic merit of these individuals. It also has value for identifying the breed composition  
65 of training populations used for genomic selection and hence the identification of target  
66 breeds in which the developed prediction equations may have some relevance. Visual  
67 classification of cattle based on breed characteristics suffers from similar problems as  
68 the self-identification of ethnicity in humans [1], as most breed characteristics are

69 determined by alleles at relatively few loci. For example, recent extensive crossing with  
70 Angus cattle in the U.S. produces a black hided animal which masks all other solid coat  
71 colors found in other breeds and requires only a single dominant allele at the *MC1R*  
72 locus. As a consequence, black-hided cattle have a “cryptic” population structure [1,2]  
73 and the visual classification of black-hided animals for branded beef programs can  
74 result in the marketing of animals with vastly different Angus genome content.

75

76 In the U.S. and many other countries, the breed of an animal is associated with its being  
77 registered with a breed association which requires that both parents of the animal be  
78 identified and also registered with the association. For the previous 50 years,  
79 parentage has been validated by each breed association using blood or, more recently,  
80 DNA typing. Many breed associations have closed herdbooks which means, in theory,  
81 that the pedigrees of all animals can be traced back to the animals that founded the  
82 breed’s herdbook. Other breed associations have open herdbooks, which means that  
83 crossbred animals can be registered with the breed if they have been graded up by  
84 crossbreeding to purebred status with the expectation that a certain percentage of their  
85 genome (e.g., 15/16ths) originates from the respective breed based upon pedigree  
86 records and parentage validation. Pedigree errors that occurred prior to, or that were  
87 not identified following the implementation of blood typing and DNA testing, lead to  
88 admixed animals being incorrectly classified as fullblood and incorrectly identified  
89 admixture proportions in purebred animals. The effects of recombination, random  
90 assortment of chromosomes into gametes and selection can also lead to considerable  
91 variation in the extent of identity by descent between relatives separated by more than a

92 single meiosis and can also lead to admixture proportions that differ substantially from  
93 expectation based on pedigree.

94

95 Crossbreeding is extensively used in commercial beef production and in other livestock  
96 species production systems to capitalize on the effects of breed complementarity and  
97 heterosis resulting in herds of females that may have very complex ancestries that  
98 frequently use fullblood or purebred bulls sourced from registered breeders. Changes in  
99 the decision as to which breed of bull to use can result in large changes in admixture  
100 proportions of replacement cows and marketed steers between years and large  
101 differences can occur between herds for the same reason. When commercially sourced  
102 animals are used to generate resource populations to study the genomics of  
103 economically important traits such as feed conversion efficiency [3,4] or bovine  
104 respiratory disease [5], the presence of extensive admixture in the phenotyped and  
105 genotyped animals may impact the GWAA [3,4] and leads to the training of genomic  
106 prediction models in populations for which the breed composition is not understood. As  
107 a consequence, the utility of these models in other industry populations, including the  
108 registered breeds in which the majority of genetic improvement is generated is also not  
109 understood.

110

111 As the number of genotyped beef animals has increased, the need to classify the breed  
112 composition of these animals has necessitated the development of a precise and  
113 accurate method for estimating breed composition in cattle based on single nucleotide  
114 polymorphism (SNP) data. Iterative ancestry estimation analyses performed using

115 different software input parameters may identify those that cause output sensitivity and  
116 can lead to an interpretation of population structure that is close to the truth [6]. We  
117 developed the CRUMBLER analysis pipeline to streamline the genomic estimation of  
118 breed composition of crossbred cattle using high-density SNP genotype data, publicly  
119 available software, and a reference panel containing genotypes for members of cattle  
120 breeds that are numerically important in North America. The CRUMBLER pipeline is  
121 species agnostic and could be adapted for breed composition estimation in other  
122 species. CRUMBLER and the reference panel data are available on GitHub  
123 (<https://github.com/tamarcrum/CRUMBLER>). This pipeline tool is released under the  
124 GNU General Public License.

125

## 126 **Materials and Methods**

127

### 128 **Genotype data**

129 From among the numerically most important cattle breeds in North America, in terms of  
130 their annual numbers of animal registrations, a list was compiled to define the target  
131 breeds for reference panel development. Composite breeds, such as Brangus and  
132 Braford, were not included in this list due to lack of available genotype data, but the  
133 progenitor Angus, Hereford and Brahman breeds were included. Breeds such as  
134 N'Dama, representing African taurine, and Nelore and Brahman, representing *Bos*  
135 *taurus indicus* cattle, were included. We also initially included breeds that were likely to  
136 be involved in early crossbreeding of cattle in the U.S. (Texas Longhorn).

137

138 From the 170,544 cattle with high-density SNP genotypes stored within the University of  
139 Missouri Animal Genomics genotype database, we extracted genotypes for 48,776  
140 animals identified as being registered with one of the numerically important U.S. Breed  
141 Associations or belonging to other world breeds. Pedigree data were also obtained for  
142 these animals from each of the Breed Associations, where available (Table 1). These  
143 individuals had been genotyped using at least one of 9 different genotyping platforms  
144 currently used internationally to genotype cattle including the GeneSeek (Lincoln, NE)  
145 GGP-90KT, GGP-F250, GGP-HDV3, GGP-LDV1, GGP-LDV3, and GGP-LDV4 assays,  
146 the Illumina (San Diego, CA) BovineHD and BovineSNP50 assays, and the Zoetis  
147 (Kalamazoo, MI) i50K assay. The numbers of variants queried by each assay and the  
148 number of individuals genotyped using each platform are shown in Table 2.

149

#### 150 **Marker set determination**

151 To maximize the utility of the developed breed assignment tool, we identified the  
152 intersection set of SNP markers located on the bovine assays for which we had  
153 available genotype data (Table 2). However, during the process of identifying the  
154 animals that would define the breed reference panel, only 16 individuals had been  
155 genotyped using the GGP-LDV4 (n=2) and GGP-LDV3 (n=14) assays and no animals  
156 had been genotyped using the GGP-LDV1 assay. To retain as many SNP markers as  
157 possible for subsequent analysis, we identified the intersection of markers present on  
158 the GGP-90KT, GGP-F250, GGP-HDV3, GGP-LDV3, GGP-LDV4, BovineHD,  
159 BovineSNP50 and i50K assays. This intersection set included 6,799 SNP markers  
160 (BC7K). The intersection of the markers representing 5 assays (GGP-90KT, GGP-  
161 F250, GGP-HDV3, BovineHD, and BovineSNP50) was 13,291 markers (BC13K). By

162 removing only the 16 individuals from the breed reference panel that had been  
163 genotyped on the GGP-LDV3 and GGP-LDV4 assays, we were able to compare  
164 ancestry predictions using two marker set densities (BC13K and BC7K).

165

## 166 **Pipeline**

167 The developed CRUMBLER pipeline integrates the tools and the computational  
168 efficiency of publicly available software, PLINK [7,8], EIGENSOFT [9,10] and  
169 SNPweights [11] to generate ancestry estimates (Fig. 1). The pipeline integrates the  
170 often cumbersome processes of data reformatting and sequentially processing the data  
171 using analytical tools to generate ancestry proportions for targeted individuals based on  
172 a curated breed reference panel.

173

## 174 **PLINK**

175 PLINK PED formatted genotypes are required as input to the pipeline. PLINK  
176 (v1.90b3.31) was used for data filtering and formatting. Genotypes can arise from any  
177 of the common bovine genotyping platforms (Table 2), provided that a PLINK  
178 compatible MAP file is provided for each assay and data produced using only a single  
179 genotyping assay is included in each PED file. The pipeline utilizes the PLINK marker  
180 filtering tool (--extract) to extract the user-specified marker subset for ancestry analysis.  
181 For analyses of animals genotyped on different genotyping platforms, the marker list  
182 representing the intersection of the platforms can be provided to extract the markers  
183 that are common to all assays. The pipeline allows multiple input genotype files and



184 uses the PLINK merge genotype files tool (--merge) to combine genotypes into a single  
185 file for downstream analysis.

186

## 187 **EIGENSOFT**

188 The EIGENSOFT convertf package is used to convert all genotypes from PLINK PED  
189 format into EIGENSTRAT format which is required by the SNPweights software. To  
190 process the reference panel data, principal component analysis using EIGENSOFT  
191 smartpca is used to generate the eigenvalues and eigenvectors that are required to  
192 calculate SNP weights using SNPweights. However, the smartpca package included in  
193 EIGENSOFT versions beyond 5.0.2 is not compatible with SNPweights. SNPweights  
194 requires an input variable, “*trace*”, to be located in the log file output from the smartpca  
195 analysis. For versions of EIGENSOFT beyond 5.0.2, the source code can be edited to  
196 ensure that the log file output is compatible with the SNPweights software (See  
197 Supplementary Information).

198

## 199 **SNPweights**

200 SNPweights implements an ancestry inference model based on genome-wide SNP  
201 weights computed using genotype data for an external panel of reference individuals.  
202 To obtain SNP weights, the matrix ( $\mathbf{g}_{ij}$ ) of reference panel genotypes for SNP  $i=1, \dots, \mathbf{M}$   
203 and individual  $j=1, \dots, \mathbf{N}$  is normalized by subtracting the mean  $\mu_i = N^{-1} \sum_j \mathbf{g}_{ij}$  and  
204 dividing by the standard deviation  $[\mathbf{p}_i(1-\mathbf{p}_i)]^{0.5}$  for each SNP, where  $\mathbf{p}_i = \mu_i/2$ , to improve  
205 the results of the subsequent PCA analysis from which a kinship matrix is generated  
206 [15]. A principal component decomposition is then used to generate the eigenvalues

207 and corresponding eigenvectors of the kinship matrix [11]. The SNP weights file only  
208 needs to be recalculated if the reference panel is changed. EIGENSTRAT formatted  
209 target animal genotypes are input into SNPweights, along with the precomputed  
210 reference panel SNP weights. The SNP weights are then applied to the target  
211 individuals to estimate their ancestry proportions [11].

212

### 213 **Reference panel development**

214 The definition of a set of reference individuals that define the genotype frequencies at  
215 each SNP variant for each reference breed is technically demanding, but vitally  
216 important to the process of defining ancestry. This process assumes that selection has  
217 not operated to change gene frequencies between target and reference population  
218 animals, and that each population is sufficiently large that drift has not impacted allele  
219 frequencies. It also assumes that migration between different countries does not  
220 influence population allele frequencies when registered animals are imported or  
221 exported. FastSTRUCTURE [12] analysis and iterations of animal filtering using  
222 SNPweights was performed using the genotypes of candidate reference panel  
223 individuals to remove individuals with significant evidence of admixture from the  
224 reference breed panel. An overview of the processes and iterations of filtering  
225 conducted in the development of this reference panel set is shown in Fig. S1 and Table  
226 1.

227

### 228 **FastSTRUCTURE analysis to identify candidate reference panel individuals**

229 Genotype data for 48,776 individuals produced by one of 8 different genotyping assays  
230 were available for fastSTRUCTURE analysis (Table 1) [12]. We initially performed  
231 focused fastSTRUCTURE analyses using small numbers of reference breeds including  
232 Angus and Simmental, Angus and Gelbvieh, Angus and Limousin, Angus and Red  
233 Angus, Red Angus, Hereford, Shorthorn and Salers, Red Angus, Hereford and  
234 Shorthorn, and N'Dama, Nelore and Brahman (Figs. S2-S8). Individuals possessing an  
235 ancestry assignment of at least 97% to their designated breed were retained for  
236 subsequent analysis (see Supplementary Methods and Table 1). Following filtering  
237 based on fastSTRUCTURE breed assignment, 17,852 individuals representing 19 of the  
238 original breeds remained for further analysis (Supplementary Methods and Figs. S2-  
239 S8). All of the Salers animals were removed in this filtering analysis which is consistent  
240 with previous work that found that Salers and Limousin were very similar [4]. Variation in  
241 reference population sample sizes has been shown to substantially influence the  
242 estimation of the number of ancestral populations (K) in ancestry analyses [6,13,14]. To  
243 minimize this effect and produce similar sample sizes for each of the reference breeds,  
244 we randomly sampled 200 individuals from each reference breed for which at least 200  
245 individuals remained after filtering on an ancestry assignment of at least 97%, otherwise  
246 all remaining individuals were included for the breed (Table 1). Following  
247 fastSTRUCTURE analysis using K=19 after removal of Salers and using the BC7K  
248 marker set, Texas Longhorn was also removed from the reference panel breed list due  
249 to the inability to distinguish Texas Longhorn as a distinct population (Figure 2).  
250 Further, due to the known common ancestry [15] and similarity between Nelore and  
251 Brahman (Figure 2), the breeds were combined to represent *Bos taurus indicus*.

252

### 253 **SNPweights analyses to refine and validate reference panel members**

254 Random sampling of reference breed individuals was performed to create sample sets  
255 containing  $\leq n$  individuals per breed, for  $n = 50, 100, 150$  and  $200$  individuals (Figs. 3 a-b  
256 and Figs. S9-S10). Sampling was performed such that if a reference breed had  $\geq n$   
257 candidates then  $n$  individuals were randomly sampled, otherwise, all available  
258 individuals were sampled. An analysis was performed using the BC7K marker set,  
259 SNPweights was used to assign reference breed ancestries to the same sample of  
260 individuals that was used to produce the SNP weights for each of the four samples of  
261 individuals (Figs. 3 a-b and Figs. S9-S10). In the self-assignment analyses conducted  
262 using the reference breed sample sets of  $\leq 100$  individuals per breed and  $\leq 50$  individuals  
263 per breed, 7 individuals were removed due to their estimated breed ancestry being  
264  $\leq 60\%$  to their registry breed (Holstein  $n=3$ , Jersey  $n=1$ , Japanese Black  $n=3$ ) (Figs. 3 a-  
265 b).

266

### 267 **Breeds with open herdbooks**

268 For the Gelbvieh, Limousin, Shorthorn, Simmental, and Braunvieh breeds that have  
269 open U.S. herdbook registries, fullblood or 100% ancestry individuals were identified  
270 based on pedigree data obtained from the respective breed associations (Table 1). The  
271 term “fullblood” is used to identify cattle for which every ancestor is registered in the  
272 herdbook and can be traced back to the breed founders. The term “purebred” refers to  
273 animals that have been graded up via crossbreeding to purebred status. Charolais also  
274 has an open herdbook registry in the U.S., however, access to Full French imported

275 Charolais breed members was limited. As a result, all Charolais individuals identified as  
276 purebred in the association registry were retained for downstream analysis, however,  
277 these individuals could contain up to 1/32 introgression from another breed. A random  
278 sample of 200 individuals was taken for each breed with more than 200 identified  
279 fullblood individuals, otherwise all animals were sampled. Individuals previously  
280 included in the candidate reference panel following preliminary fastSTRUCTURE  
281 filtering for the open herd book breeds were removed and replaced with the fullblood  
282 individuals.

283

#### 284 **Additional reference panel filtering using SNPweights**

285 After filtering animals identified to not be fullblood based on their pedigree information,  
286 we randomly sampled  $\leq 50$  individuals per reference breed and utilized SNPweights to  
287 estimate weights for each sample and also to estimate breed ancestries for members of  
288 the same sample that was used to generate the SNP weights. Based on these  
289 analyses, we created 5 overlapping reference breed sets, each containing individuals  
290 with  $\geq 90\%$ ,  $\geq 85\%$ ,  $\geq 80\%$ ,  $\geq 75\%$ , or  $\geq 70\%$  ancestry assignment to their registry breeds  
291 (Table 3).

292

#### 293 **Simulated Genotypes**

294 Using the phased BC7K genotypes for the final reference population of 803 individuals  
295 (3 Nelore genotyped with the BovineHD assay were removed because they were  
296 determined to cause problems for the phasing software), we simulated genotypes for  
297 803 individuals each generation ( $N = 1, 3, 5$  and  $10$ ) by randomly sampling two

298 individuals as parents from generation N-1 and using a Poisson distribution to sample at  
299 random a single recombinant chromosome from each parent. The number of  
300 recombination events for each sampled chromosome was sampled from a Poisson  
301 distribution with mean equal to chromosome length in Mb/100 (i.e. 1.58 Morgans for  
302 chromosome 1). Simulated genotypes were produced for individuals 1 generation  
303 removed from the fullblood/purebred reference population animals (i.e., 50% breed A  
304 and 50% breed B), 3, 5, and 10, generations, respectively, to evaluate the ability of  
305 CRUMBLER to detect large through to small admixture proportions in animals with  
306 increasing numbers of breeds represented in their ancestry. Breed composition  
307 estimates for these animals were obtained by tracing the breed of origin of every allele  
308 present in each generation N animal. For each marker, we attributed the genomic  
309 fragment from the center points of the intervals on each side of each marker to the  
310 breed of origin of the two alleles at each marker and summed these across all loci.  
311 Finally, we normalized these sums by dividing by the autosomal genome size using  
312 UMD3.1 coordinates.

313

## 314 **Results and Discussion**

315

316 The concept of breed and breed membership is man-made and does not inherently  
317 exist in nature. Moreover, the formation of breeds of cattle is very recent, as cattle  
318 domestication began about 10,000 years ago but the formation of herdbooks has  
319 occurred only during the last 200-250 years [16]. Nevertheless, the effects of drift and  
320 human selection over the last 200 years have caused sufficient divergence among

321 breeds that breed differences are identifiable at the molecular level. Such signals are  
322 essential for breed ancestry analyses to be effective in modern admixed animals.  
323 Previous work on assigning breed composition in admixed cattle utilized 50K genotype  
324 data and a reference panel of 16 breeds, with the basis for reference panel inclusion  
325 being breed association registration [17]. However, the continual evolution of  
326 genotyping assays has led to content changes resulting in only a relatively small  
327 proportion of markers in common among assays. Consequently, there is a need to  
328 evaluate whether these markers are sufficient for breed content estimation, leading to  
329 their conservation in the design of future assays. Furthermore the development of an  
330 analytical pipeline based on these markers would simplify analysis for end-users and  
331 the use of a single reference panel would allow the direct comparison of results  
332 between applications.

333

### 334 **Reference panel development**

335 Previously developed cattle reference panels have relied on pedigree accuracy and  
336 breed association registration for their definition [17]. Conversely, we used an iterative  
337 approach for reference population curation that was able to validate the accuracy of the  
338 pedigree information used to identify candidates. FastSTRUCTURE analyses  
339 performed using the candidate individuals for each of the initial 19 reference breeds  
340 suggested population subdivision in both the Hereford and Simmental (Figure 2).  
341 Pedigree analysis for the Herefords within each subpopulation indicated that the  
342 subpopulations comprised animals from the highly inbred USDA Miles City Line 1  
343 Hereford population (L1) and other individuals representing broader U.S. Hereford

344 pedigrees. The Miles City L1 Hereford cattle were derived from two bulls, both sired by  
345 Advance Domino 13 (AHA registration number 1668403) and 50 Hereford foundation  
346 cows. Since the founding of the L1 Herefords, the migration of germplasm has been  
347 unidirectional from L1 into the broader U.S. industry, as the L1 population has been  
348 closed since its founding [18]. However, the L1 Herefords have profoundly influenced  
349 the U.S. Hereford population. L1 Herefords do not segregate for recessive dwarfism,  
350 which has been a threat to Hereford breeders since the 1950s, and this has led to L1  
351 cattle becoming popular in the process of purging herds of the defect [19]. In 1980, the  
352 average proportion of U.S. registered Herefords influenced by L1 genetics was 23%.  
353 By 2008, this proportion had increased to 81% [18].

354

355 The detected subpopulation division within the Simmental breed (Figure 2) represents  
356 the differentiation between purebred and fullblood animals. For example, progeny of a  
357 popular fullblood Simmental sire are present in both subpopulations, however, in one  
358 subpopulation the family members are all fullblood and in the other they are all purebred  
359 or percentage Simmental animals. This result supports the need to identify fullblood  
360 animals as reference panel breed representatives for breeds with open herdbooks.

361

### 362 Reference population sample size

363 By randomly sampling individuals from the candidate reference breed set and using  
364 SNPweights to assign these individuals to reference populations, we found that  
365 reference panel breed sample sizes of  $\leq 50$  or  $\leq 100$  individuals appeared to capture the  
366 diversity within each breed and appropriately determined the ancestry of the tested



367 individuals (Fig. 3 a-b). For each breed, the percent ancestry predicted for the tested  
368 reference samples was, on average, 3.86% higher when the SNP weights were  
369 estimated using  $\leq 50$  individuals per breed than when  $\leq 100$  individuals per breed were  
370 used (Table 4). This reflects the increased homogeneity of individuals within each  
371 breed and a greater genetic distance between individuals from different breeds as  
372 smaller samples of individuals from each breed are used to define the reference panel.  
373 Further, due to limitations in the number of genotyped individuals for some breeds  
374 (Table 1), as the sample size was increased globally, imbalances were created between  
375 the reference panel breed sample sizes which impacted breed composition estimation  
376 (Fig. S9-S10). It has previously been shown that the power to detect population  
377 structure improves as the reference population sample sizes become more similar  
378 [6,14].

379

### 380 Marker density

381 After the replacement of reference breed individuals with those identified to be fullblood  
382 based on pedigree analysis for the open herdbook Gelbvieh, Simmental, Limousin,  
383 Braunvieh, Shorthorn, and Charolais breeds, additional self-assignment analyses were  
384 conducted to evaluate the effects of marker set size on ancestry prediction. Breed  
385 reference panels were again constructed by randomly sampling  $\leq 50$  individuals per  
386 breed and SNP weights were calculated using both the BC13K markers and BC7K  
387 markers. The estimated SNP weights were then used to self-assign ancestry to  
388 members of the reference panel animals representing the reference breed set. The  
389 ancestry predictions for the reference breed individuals using either the BC7K (Fig. 4a;

390 Fig. S11) or BC13K (Fig. 4b; Fig. S12) marker sets indicate that use of the BC13K  
391 marker set did not significantly impact the ancestry predictions. Consequently, the use  
392 of the 6,799 markers common to the 8 commercially available genotyping platforms  
393 appears to be sufficient to assign breed ancestry for the majority of animals produced in  
394 the U.S. The CRUMBLER pipeline can accommodate samples genotyped using  
395 alternative assays, however, the produced breed composition estimates will be based  
396 on the intersection of markers on the assay and the BC7K marker set.

397

### 398 Assignment thresholds

399 We next examined the effects of reference breed homogeneity on ancestry assignment  
400 by identifying reference panel members that had been assigned to their breed of  
401 registry using SNPweights with probabilities of ancestry of  $\geq 90\%$ ,  $\geq 85\%$ ,  $\geq 80\%$ ,  $\geq 75\%$ ,  
402 and  $\geq 70\%$ , respectively (Table 3). From these individuals, reference breed panels were  
403 obtained by randomly sampling  $\leq 50$  individuals per breed, until each individual was  
404 represented in at least one sample set. SNP weights were then estimated using the  
405 BC7K marker set and ancestry was assigned for these individuals using SNPweights  
406 (Figs. 5-6 and Figs. S13-S15). Limiting the reference breed panel members to those  
407 individuals with  $\geq 90\%$  ancestry assigned to their breed of registry produced a reference  
408 panel that did not represent the extent of diversity within each of the breeds (Fig. 5). On  
409 the other hand, using an ancestry assignment of  $\geq 85\%$  clearly captured greater diversity  
410 within each breed (Fig. 6) and maximized the self-assignment of ancestry to the breed  
411 of registration (Table 5).

412

413 Reference panel definition

414 To examine whether the specific individuals represented in the reference panel sample  
415 influenced the self-assignment of ancestry to the sampled individuals, a second sample  
416 of  $\leq 50$  distinct individuals per breed was obtained from the individuals with  $\geq 85\%$   
417 assignment to their breed of registration and analyzed with SNPweights (Fig. 7). Fig. 7  
418 indicates that the ability to predict ancestry was not influenced by the specific individuals  
419 sampled from the set of animals with  $\geq 85\%$  ancestry to their breed of registration.

420

421 Additionally, Figs. 6 and 7 suggest that the use of a reference breed panel constructed  
422 by the random sampling of  $\leq 50$  individuals per breed from individuals with  $\geq 85\%$  self-  
423 assigned ancestry to their breed of registration maintained sufficient within-breed  
424 diversity to accurately estimate the ancestry of target individuals. However, these  
425 figures also reveal small amounts of apparent introgression from other reference panel  
426 breeds within each of the breeds. This does not appear to be an issue of marker  
427 resolution since the analyses performed with the BC7K and BC13K marker sets  
428 generated similar results (Fig. 4). We conclude that these apparent introgressions are  
429 either due to a lack of power to discriminate among breeds using the common markers  
430 designed onto commercial genotyping platforms, or represent the presence of common  
431 ancestry among the breeds prior to the formation of breed herdbooks  $\sim 200$  years ago.  
432 Molecular evidence for this shared ancestry exists, for example, Hereford and Angus  
433 cattle share the *Celtic* polled allele [20] and the segmental duplication responsible for  
434 the white anterior, ventral and dorsal coat color pattern occurs only in Hereford and

435 Simmental cattle and their crosses [21]. These data clearly indicate that crossbreeding  
436 was widespread prior to the formal conceptualization of breeds.

437

### 438 **Reference panel validation**

439 To evaluate the ability of the selected reference breed panel to identify breed  
440 composition, an analysis was conducted for all 170,544 samples in the database which  
441 required 60 processor minutes (Fig 6-7). We extracted animals with pedigree  
442 information including fullblood and purebred animals registered with open herdbook  
443 breed associations and 2,243 crossbred animals with varying degrees of admixture.  
444 Considering the amount of available data, the number of pedigreed admixed animals  
445 was very limited and the purebred animals all had similar expected admixture  
446 proportions. Consequently, we next simulated genotypes for animals by assuming the  
447 random mating of members of the reference breed panel for 1, 3, 5 and 10 generations  
448 assuming non-overlapping generations to generate generations of animals with different  
449 numbers of breeds and breed proportions represented in their genomes.

450

### 451 Registered fullblood animals

452 For the Gelbvieh, Limousin, Shorthorn, Simmental, and Braunvieh breeds that have  
453 open herdbook registries, fullblood or 100% ancestry individuals were identified based  
454 on pedigree data obtained from the respective breed associations (Table 1).  
455 CRUMBLER estimates were obtained for these fullblood individuals and the distribution  
456 of estimates by breed are in Fig. 8. For all breeds except Charolais, >50% of the  
457 individuals had CRUMBLER estimated percentages of  $\geq 80\%$  to their respective breeds.

458 Average percentage estimates for fullblood Gelbvieh, Limousin, Shorthorn, Simmental,  
459 and Braunvieh individuals were 76%, 78%, 83%, 79%, and 85%, respectively (Fig. 8b).  
460 However, the number of genotyped imported Full French Charolais animals was limited  
461 and so we also analyzed all purebred Charolais individuals which could contain up to  
462 1/32<sup>nd</sup> of their genome introgressed from another breed. The average Charolais breed  
463 assignment was 72% and the distribution of estimates was more variable than for the  
464 fullblood animals from the other breeds (Fig. 8b).

465

#### 466 Pedigreed crossbred animals

467 Based on pedigree, 2,005 individuals were identified as being primarily Hereford but  
468 with varying degrees of Red Angus, Salers, Angus or unknown other breed influence.  
469 The analysis results agreed with the pedigree data (Fig. 9a) To investigate the  
470 correlations between pedigree and CRUMBLER estimated breed proportions, we  
471 removed proportions for breeds that were less than 3% and normalized the remaining  
472 values. CRUMBLER estimates were then correlated with the pedigree predicted  
473 estimates of the proportion of Hereford in these individuals (Fig. 9c). CRUMBLER  
474 tended to underestimate the Hereford proportion as the pedigree estimated Hereford  
475 proportion tended to 100%.

476

477 The remaining 238 crossbred individuals were commercial, advanced generation  
478 animals with an expected 50% Angus and 50% Simmental ancestry based on pedigree  
479 data. Results of the CRUMBLER analysis again support the pedigree data (Fig. 10).  
480 The presence of Red Angus ancestry in these animals reveals the inability of the

481 analysis to fully differentiate between Angus and Red Angus, which only diverged in the  
482 U.S. in 1954, and also the influence of Red Angus in the U.S. Simmental breed (Fig.  
483 S16).

484

#### 485 Simulated genotypes

486 Genomes were simulated using the phased genotypes for 803 individuals from the  
487 reference breed panel to contain varying breed numbers and admixture proportions  
488 after 1, 3, 5, and 10 generations of random mating with nonoverlapping generations. In  
489 generation 1, the admixed individuals were  $F_1$  individuals with a 50:50 autosomal  
490 genome composition unless both parents were randomly sampled from the same breed.  
491 CRUMBLER estimates of breed composition using the simulated genotypes were  
492 strongly correlated with the simulated compositions, especially for generations 1 and 3  
493 (Fig 11). As the number of generations increased, the number of breeds represented in  
494 the simulated genomes tended to increase and the proportion of the genome originating  
495 from any one breed tended to decrease and the correlation between the simulated  
496 proportions and CRUMBLER estimates also decreased. Nevertheless, by generation 10  
497 44% of animals had their genome proportions estimated with a correlation of at least  
498 70%. In the U.S. commercial crossbreeding does not usually involve the use of more  
499 than 3-4 breeds of cattle and while the number of generations of crossbreeding may  
500 very well be 10 or perhaps more, many generations will involve the mating of animals  
501 with similar genome ancestries and the proportions for each breed will be much greater  
502 than present in the generation 10 animals in Fig 11. Consequently, the achieved  
503 accuracies are likely to be closer to the generation 3 or 5 results where 99% and 68% of

504 animals, respectively, had their genome proportions estimated with a correlation of  
505 greater than 80%.

506

#### 507 Advanced generation composite animals

508 The ancestry model assumes that neither drift or selection has acted to alter the allele  
509 frequencies from those created by the initial admixture proportions. We examined  
510 CRUMBLER estimates of breed composition for advanced generation members of the  
511 Brangus (n=11,362), Beefmaster (n=3,832) and Santa Gertrudis (n=2,010) composite  
512 breeds where selection has had the opportunity to change breed composition from  
513 expectations at breed formation. Brangus individuals are expected to be  $\frac{5}{8}$  Angus and  
514  $\frac{3}{8}$  Brahman, Beefmaster individuals  $\frac{1}{4}$  Hereford,  $\frac{1}{4}$  Shorthorn and  $\frac{1}{2}$  Brahman, and  
515 Santa Gertrudis  $\frac{5}{8}$  Shorthorn and  $\frac{3}{8}$  Brahman, respectively. These breeds use mating  
516 strategies that produce individuals that are expected to possess these proportions for  
517 registration within each of the respective breed's herdbook. However, registerable  
518 animals are ultimately advanced generation composites and so drift, meiotic sampling of  
519 parental chromosomes and selection are all expected to create individual variation in  
520 these ancestry proportions. CRUMBLER results for these advanced generation  
521 composites, also known as the American breeds, are shown in Figure 12. Table 6  
522 contains the average breed proportion estimates assigned to each of these breeds by  
523 CRUMBLER and their standard deviations across the animals analyzed for each breed.  
524 In every instance, CRUMBLER underestimates the expected proportions for each of the  
525 American breed populations, however, the ancestral breeds clearly dominate the  
526 assignments (Table 6). Interestingly, on average, CRUMBLER estimated proportions of

527 Holstein ancestry for advanced generation Beefmaster and Brangus animals (Figure 12  
528 and Table 6). These American breeds do not contain any Holstein introgression and  
529 they do not contain ancestry from a “Ghost Population”, a population that is not present  
530 in the reference set, which would lead to a breed assignment to a reference breed that it  
531 most closely resembled [6]. We speculate that this effect is caused by selection  
532 creating a deviation in allele frequencies from those found in the founder breeds which  
533 the model explains by an introgression from a distantly related breed, in this case,  
534 Holstein. Stratifying these genotyped animals according to the number of generations  
535 from foundation fullblood animals and examining the extent of estimated Holstein  
536 introgression, which would be expected to increase with generation number, would  
537 enable this to be tested, but we did not have access to the necessary data. However,  
538 this hypothesis is supported by the fact that the Santa Gertrudis had the least estimated  
539 Holstein introgression and the breed has published estimates of additive genetic merit  
540 for many fewer years than the Beefmaster or Brangus.

541

## 542 **Admixture**

543 We also tested the ADMIXTURE software [22] for ancestry estimation and integration  
544 into the CRUMBLER pipeline using the same reference breed panel that was developed  
545 for use with SNPweights. ADMIXTURE uses maximum likelihood estimation to fit the  
546 same statistical model as STRUCTURE, however, STRUCTURE does not allow the  
547 specification of individuals of known descent to be used as a reference panel [22].  
548 ADMIXTURE allows a supervised analysis, in which the user can specify a reference  
549 set of individuals, by specifying the “--supervised” flag and requires an additional file



550 with a “.pop” suffix to specify the genotypes of the reference population individuals [22].  
551 Unlike SNPweights, the reference population individuals’ genotypes must be provided in  
552 a genotype file for each analysis.

553

554 We first conducted an ADMIXTURE analysis in which we self-assigned ancestry for the  
555 animals in the reference breed set formed with  $\leq 50$  individuals per breed from the  
556 individuals that had  $\geq 85\%$  assignment to the breed of registration (Fig. 13). The results  
557 shown in Fig. 13 are similar to those in Fig. 6 for the same reference panel, albeit with  
558 perhaps less evidence of background introgression. We next conducted an analysis  
559 using the reference panel used in Fig. 13 merged with data for the 2,005 high  
560 percentage crossbred Herefords animals. The results shown in Fig. 14, reveal a  
561 significant change in the ancestry proportions estimated for the reference panel  
562 Guernsey, Gelbvieh and Romagnola individuals between the two analyses which used  
563 exactly the same reference panel, but differed only in the number of individuals for  
564 which ancestry was to be estimated. This suggests that ADMIXTURE may use the  
565 target individuals to update information provided by the reference panel individuals  
566 specified in the “.pop” file. Consequently, the ADMIXTURE estimated ancestry  
567 proportions appear to be context dependent and may vary based on the other  
568 individuals included in the analysis.

569

570 Moreover, the order in which the target individuals appear in the genotype input file also  
571 appears to affect ADMIXTURE estimates of ancestry proportions for the target  
572 individuals. Fig. 15 shows the results of an ADMIXTURE analysis in which the target

573 individuals were identical to those shown in Fig. 14, but for which the order of the  
574 reference individuals and the 2,005 Hereford crossbred individuals was reversed in the  
575 input files. In Fig. 14, the reference individuals appear before the 2,005 Hereford  
576 crossbred individuals in the input file, whereas in Fig. 15, the 2,005 Hereford crossbred  
577 individuals appeared before the reference individuals in the input file. The results reveal  
578 a significant change in ancestry proportions for Guernsey and Gelbvieh, but the  
579 Romagnola now appear to be non-admixed. Finally, we performed an ADMIXTURE  
580 analysis for these animals in which the order of animals in the input genotype file was  
581 completely randomized (Fig. 16). Following analysis, the individuals were sorted to  
582 generate Fig. 16. Again, the ancestry proportions for the Guernsey, Gelbvieh and  
583 Romagnola individuals suggest these breeds to be admixed.

584  
585 STRUCTURE and ADMIXTURE are widely used for characterizing admixed populations  
586 [6], however, we have not found any reports in the literature that indicate that the  
587 software is sensitive to the input order of individuals. However, we suspect that the  
588 majority of users would have no need or motivation to run the software with permuted  
589 data input files. Nevertheless, because of these inconsistencies between results, we  
590 chose to not use ADMIXTURE for ancestry estimation within the CRUMBLER pipeline.

591  
592 **Broader application using additional commercially available assays**  
593 To broaden the spectrum of data from different commercially available assays that can  
594 be evaluated, an additional intersection of markers was obtained using 11 commercially  
595 available bovine assays including the GGP-90KT, GGP-F250, GGP-HDV3, GGP-LDV3,

596 GGP-LDV4, BovineHD, BovineSNP50, i50K, Irish Cattle Breeding Federation (Cork,  
597 Ireland) IDBv3, and GeneSeek (Lincoln, NE) BOVG50v1 assays. The intersection SNP  
598 set included 6,363 SNPs (BC6K). A SNPweights self-assignment analysis using the  
599 reference set of individuals with  $\geq 85\%$  assignment to their breed of registration was  
600 conducted to assess the effects of the reduction in number of markers used for ancestry  
601 assignment. The ancestry proportions assigned based on the BC6K marker set (Fig.  
602 17) did not differ appreciably from those obtained using the BC7K marker set (Fig. 6).  
603 This result indicates the utility of CRUMBLER and the reference panel breed set across  
604 the spectrum of commercially available genotyping platforms.

605

## 606 **Conclusions**

607 The determination of a set of reference population breeds and individuals that define  
608 allele and genotype frequencies at each variant for each of the breeds is arguably the  
609 most important, yet technically difficult step in the process of ancestry estimation. We  
610 employed several iterations of filtering to remove recently admixed individuals and  
611 identify a relatively homogeneous set of individuals that nevertheless represented the  
612 variation that might be expected among individuals within a breed. Once determined,  
613 the reference panel genotype data need only be processed once to obtain SNP weights  
614 removing the need to share genotype data for reference individuals in subsequent  
615 studies [11]. The upfront development of an external reference breed panel capitalizes  
616 on the rich ancestry information available in large available datasets, and relatedness,  
617 variation in sample sizes and diversity among the target individuals does not affect the  
618 inference of ancestry [11].

619

620 In cattle, the visual evaluation of breed characteristics is a poor method for evaluating  
621 the ancestry of individuals. Breed association pedigrees can be used to estimate  
622 expected breed compositions, however, the random assortment of chromosomes into  
623 gametes and selection can lead to ancestry proportions that differ from those expected  
624 based upon pedigree. Moreover, the vast majority of commercial beef cattle in the U.S.  
625 have no or very limited pedigree information and since these animals are frequently  
626 used for genomic research [3–5], there is a need for a tool that can routinely provide  
627 ancestry estimates for downstream use in GWAA or other genetic studies.

628

629 We tested ADMIXTURE and SNPweights and found that results from ADMIXTURE  
630 appear to depend on the ancestry and order of appearance of individuals within the  
631 genotype input file. We therefore developed an analysis pipeline, CRUMBLER, based  
632 upon PLINK, EIGENSOFT and SNPweights to automate the process of ancestry  
633 estimation. The developed bovine pipeline utilizes the 6,799 SNPs present on 8  
634 commercially utilized bovine SNP genotyping assays and results using these SNPs are  
635 consistent with results obtained when 13,291 SNPs were used. From an available  
636 48,776 genotyped individuals, we also developed a reference panel of 806 individuals  
637 sampled from 17 breeds to have  $\leq 50$  individuals per breed that had  $\geq 85\%$  assignment  
638 to their breed of registration. This panel appears to allow the robust estimation of the  
639 ancestry of advanced generation admixed animals, however, all breeds share some  
640 common ancestry which predates the recent development of breed association  
641 herdbooks [16,23].

642

643 CRUMBLER is not limited to application in cattle and with the provision of suitable  
644 reference breed allele frequencies can be applied to other species for ancestry  
645 estimation. CRUMBLER pipeline scripts and reference panel breed SNP weights are  
646 available on GitHub (<https://github.com/tamarcrum/CRUMBLER>).

647 **Additional files**

648 **Supplementary Information (PDF).** This file contains the source code changes in  
649 SMARTPCA within versions of EIGENSOFT beyond 5.0.2 to enable compatibility with  
650 SNPweights.

651  
652 **Supplementary Methods (PDF).** This file describes the preliminary fastSTRUCTURE  
653 analyses conducted on subsamples of breeds in the development of the reference  
654 breed panel.

655  
656 **Supplementary Figures (PDF).** This file contains Supplementary Figures S1-S16.

657  
658 **Fig. S1 An overview of the processes and iterations of filtering conducted in the**  
659 **development of the reference panel.**

660  
661 **Fig. S2 Preliminary FastSTRUCTURE analysis of candidate Angus and Simmental**  
662 **reference population animals.**

663  
664 **Fig. S3 Preliminary fastSTRUCTURE analysis of candidate Angus and Gelbvieh**  
665 **reference population animals.**

666  
667 **Fig. S4 Preliminary fastSTRUCTURE analysis of candidate Angus and Limousin**  
668 **reference population animals.**

669

670 **Fig. S5 Preliminary fastSTRUCTURE analysis of candidate Angus and Red Angus**  
671 **reference population animals.**

672

673 **Fig. S6 Preliminary fastSTRUCTURE analysis of candidate Red Angus, Hereford,**  
674 **Shorthorn and Salers reference population animals.**

675

676 **Fig. S7 Preliminary fastSTRUCTURE analysis of candidate Red Angus, Hereford**  
677 **and Shorthorn reference population animals.**

678

679 **Fig. S8 Preliminary fastSTRUCTURE analysis of candidate N'Dama, Nelore and**  
680 **Brahman reference population animals.**

681

682 **Fig. S9 SNPweights self-assignment analysis for the reference sample set**  
683 **containing  $\leq 200$  individuals per breed analyzed using the BC7K marker set.**

684

685 **Fig. S10 SNPweights self-assignment analysis for the reference sample set**  
686 **containing  $\leq 150$  individuals per breed analyzed using the BC7K marker set.**

687

688 **Fig. S11 SNPweights self-assignment analysis for the reference sample set**  
689 **containing  $\leq 50$  individuals per breed analyzed using the BC7K marker set.**

690

691 **Fig. S12 SNPweights self-assignment analysis for the reference sample sets**  
692 **containing  $\leq 50$  individuals per breed analyzed using the BC13K marker set.**

693

694 **Fig. S13 SNPweights self-assignment analysis for the reference sample set with**  
695 **≥80% ancestry to breed of registry and ≤50 individuals per breed using the BC7K**  
696 **marker set.**

697

698 **Fig. S14 SNPweights self-assignment analysis for reference sample set with ≥75%**  
699 **ancestry to breed of registry and ≤50 individuals per breed using the BC7K**  
700 **marker set.**

701

702 **Fig. S15 SNPweights self-assignment analysis for the reference sample set with**  
703 **≥70% ancestry to breed of registry and ≤50 individuals per breed using the BC7K**  
704 **marker set.**

705

706 **Fig. S16 SNPweights self-assignment analyses using a reference panel with ≤50**  
707 **individuals per breed and sampling from the individuals with ≥85% assignment to**  
708 **their breed of registry but with (a) Red Angus or (b) Angus excluded from the**  
709 **reference panel.**

710

#### 711 **Authors' contributions**

712 TC conceived the study and managed the project. TC, RS, JD, and JT contributed to  
713 defining the research questions and analytical approaches and interpretation of the  
714 results. TC programmed the CRUMBLER pipeline and carried out the data analyses.  
715 TC and JT drafted the manuscript. LR provided the Nelore samples but did not have



716 involvement in the scientific direction. All authors read and approved the final  
717 manuscript.

718

### 719 **Competing interests**

720 The authors declare that they have no competing interests.

721

### 722 **Availability of data and materials**

723 Project Name: CRUMBLER

724 Project Home Page: <https://github.com/tamarcrum/CRUMBLER>

725 Programming Language: Python

726 Other Requirements: PLINK, EIGENSOFT, and SNPweights

727 License: GNU GPL

728

### 729 **Ethics approval and consent to participate**

730 Not applicable.

731

### 732 **Funding**

733 JT and RS appreciate the support of NIH-USDA Dual Purpose with Dual Benefit

734 Program grant number NIH 1R01HD084353. JT and RS are supported by USDA-NIFA

735 grants 2013-68004-20364, 2015-67015-23183, 2016-67015-24923 and 2017-67015-

736 26760.

737

### 738 **Consent for Publication**

739 Not applicable.

740

741 **Acknowledgements**

742 Not applicable.

743

## 744 **References**

- 745 1. Burnett MS, Strain KJ, Lesnick TG, de Andrade M, Rocca WA, Maraganore DM.  
746 Reliability of self-reported ancestry among siblings: implications for genetic  
747 association studies. *Am J Epidemiol*. 2006 Mar 1;163(5):486–92.
- 748 2. Pritchard JK, Stephens M, Donnelly P. Inference of population structure using  
749 multilocus genotype data. *Genetics*. 2000 Jun;155(2):945–59.
- 750 3. Saatchi M, Beever JE, Decker JE, Faulkner DB, Freetly HC, Hansen SL, et al.  
751 QTLs associated with dry matter intake, metabolic mid-test weight, growth and feed  
752 efficiency have little overlap across 4 beef cattle studies. *BMC Genomics*. 2014  
753 Nov 20;15:1004.
- 754 4. Seabury CM, Oldeschulte DL, Saatchi M, Beever JE, Decker JE, Halley YA, et al.  
755 Genome-wide association study for feed efficiency and growth traits in U.S. beef  
756 cattle. *BMC Genomics*. 2017 May 18;18(1):386.
- 757 5. Neiberghs HL, Seabury CM, Wojtowicz AJ, Wang Z, Scraggs E, Kiser JN, et al.  
758 Susceptibility loci revealed for bovine respiratory disease complex in pre-weaned  
759 holstein calves. *BMC Genomics*. 2014 Dec 22;15:1164.
- 760 6. Lawson DJ, van Dorp L, Falush D. A tutorial on how not to over-interpret  
761 STRUCTURE and ADMIXTURE bar plots. *Nat Commun*. 2018 Aug 14;9(1):3258.
- 762 7. Purcell S, Neale B, Todd-Brown K, Thomas L, Ferreira MAR, Bender D, et al.  
763 PLINK: a tool set for whole-genome association and population-based linkage

- 764 analyses. *Am J Hum Genet.* 2007 Sep;81(3):559–75.
- 765 8. Chang CC, Chow CC, Tellier LC, Vattikuti S, Purcell SM, Lee JJ. Second-  
766 generation PLINK: rising to the challenge of larger and richer datasets.  
767 *Gigascience.* 2015 Feb 25;4:7.
- 768 9. Patterson N, Price AL, Reich D. Population structure and eigenanalysis. *PLoS*  
769 *Genet.* 2006 Dec;2(12):e190.
- 770 10. Price AL, Patterson NJ, Plenge RM, Weinblatt ME, Shadick NA, Reich D. Principal  
771 components analysis corrects for stratification in genome-wide association studies.  
772 *Nat Genet.* 2006 Aug;38(8):904–9.
- 773 11. Chen C-Y, Pollack S, Hunter DJ, Hirschhorn JN, Kraft P, Price AL. Improved  
774 ancestry inference using weights from external reference panels. *Bioinformatics.*  
775 2013 Jun 1;29(11):1399–406.
- 776 12. Raj A, Stephens M, Pritchard JK. fastSTRUCTURE: Variational Inference of  
777 Population Structure in Large SNP Data Sets. *Genetics.* 2014 Jun 1;197(2):573–  
778 89.
- 779 13. Wang J. The computer program structure for assigning individuals to populations:  
780 easy to use but easier to misuse. *Mol Ecol Resour.* 2017 Sep;17(5):981–90.
- 781 14. Puechmaille SJ. The program structure does not reliably recover the correct  
782 population structure when sampling is uneven: subsampling and new estimators  
783 alleviate the problem. *Mol Ecol Resour.* 2016 May;16(3):608–27.

- 784 15. Sanders JO. History and Development of Zebu Cattle in the United States. *J Anim*  
785 *Sci.* 1980 Jun 1;50(6):1188–200.
- 786 16. Decker JE, McKay SD, Rolf MM, Kim J, Molina Alcalá A, Sonstegard TS, et al.  
787 Worldwide patterns of ancestry, divergence, and admixture in domesticated cattle.  
788 *PLoS Genet.* 2014 Mar;10(3):e1004254.
- 789 17. Kuehn LA, Keele JW, Bennett GL, McDanel TG, Smith TPL, Snelling WM, et al.  
790 Predicting breed composition using breed frequencies of 50,000 markers from the  
791 US Meat Animal Research Center 2,000 Bull Project. *J Anim Sci.* 2011  
792 Jun;89(6):1742–50.
- 793 18. Leesburg VLR, MacNeil MD, Naser FWC. Influence of Miles City Line 1 on the  
794 United States Hereford population. *J Anim Sci.* 2014 Jun;92(6):2387–94.
- 795 19. McCann LP. battle of bull runts. 1974; Available from: [http://agris.fao.org/agris-](http://agris.fao.org/agris-search/search.do?recordID=US201300539215)  
796 [search/search.do?recordID=US201300539215](http://agris.fao.org/agris-search/search.do?recordID=US201300539215)
- 797 20. Wiedemar N, Tetens J, Jagannathan V, Menoud A, Neuenschwander S,  
798 Bruggmann R, et al. Independent polled mutations leading to complex gene  
799 expression differences in cattle. *PLoS One.* 2014 Mar 26;9(3):e93435.
- 800 21. Whitacre L. Structural variation at the KIT locus is responsible for the piebald  
801 phenotype in Hereford and Simmental cattle. 2014; Available from:  
802 [http://search.proquest.com/openview/45eba5fa3c5757a2c4c2ab18af1a8a98/1?pq-](http://search.proquest.com/openview/45eba5fa3c5757a2c4c2ab18af1a8a98/1?pq-origsite=gscholar&cbl=18750&diss=y)  
803 [origsite=gscholar&cbl=18750&diss=y](http://search.proquest.com/openview/45eba5fa3c5757a2c4c2ab18af1a8a98/1?pq-origsite=gscholar&cbl=18750&diss=y)

- 804 22. Alexander DH, Novembre J, Lange K. Fast model-based estimation of ancestry in  
805 unrelated individuals. *Genome Res.* 2009 Sep;19(9):1655–64.
- 806 23. Decker JE, Pires JC, Conant GC, McKay SD, Heaton MP, Chen K, et al. Resolving  
807 the evolution of extant and extinct ruminants with high-throughput phylogenomics.  
808 *Proc Natl Acad Sci U S A.* 2009 Nov 3;106(44):18644–9.
- 809

810 **Table 1. Genotype data for 48,776 registered individuals from 20 breeds were**  
 811 **used to establish the reference population.**  
 812

| <b>Breed</b>   | <b>No. Registered Individuals</b> | <b>No. FullBlood Individuals<sup>a</sup></b> | <b>No. Individuals Assigned to Breed<sup>b</sup></b> | <b>Sampled Individuals<sup>c</sup></b> | <b>No. Individual After Pedigree and SNPweights<sup>d</sup></b> |
|----------------|-----------------------------------|----------------------------------------------|------------------------------------------------------|----------------------------------------|-----------------------------------------------------------------|
| Angus          | 5552                              | 5552                                         | 485                                                  | 200                                    | 200                                                             |
| Hereford       | 969                               | 969                                          | 348                                                  | 200                                    | 200                                                             |
| Limousin       | 2734                              | 321                                          | 367                                                  | 200                                    | 200                                                             |
| Charolais      | 1542                              | 1489                                         | 1542                                                 | 200                                    | 200                                                             |
| Simmental      | 15858                             | 337                                          | 1583                                                 | 200                                    | 196                                                             |
| Japanese Black | 97                                | 97                                           | 97                                                   | 97                                     | 94                                                              |
| Braunvieh      | 148                               | 69                                           | 148                                                  | 148                                    | 69                                                              |
| Gelbvieh       | 12835                             | 51                                           | 6000                                                 | 200                                    | 51                                                              |
| Romagnola      | 37                                | 37                                           | 37                                                   | 37                                     | 37                                                              |
| Salers         | 68                                | 68                                           | 0                                                    | 0                                      | 0                                                               |
| Texas Longhorn | 45                                | 45                                           | 45                                                   | 0                                      | 0                                                               |
| Shorthorn      | 291                               | 178                                          | 166                                                  | 166                                    | 178                                                             |
| Red Angus      | 1377                              | 1377                                         | 124                                                  | 124                                    | 124                                                             |
| Holstein       | 5816                              | 5816                                         | 5816                                                 | 200                                    | 197                                                             |
| Jersey         | 119                               | 119                                          | 119                                                  | 119                                    | 118                                                             |
| Brown Swiss    | 92                                | 92                                           | 92                                                   | 92                                     | 90                                                              |
| Guernsey       | 30                                | 30                                           | 30                                                   | 30                                     | 30                                                              |
| N'Dama         | 98                                | 98                                           | 59                                                   | 59                                     | 59                                                              |
| Brahman        | 127                               | 127                                          | 86                                                   | 86                                     | 50                                                              |
| Nelore         | 941                               | 941                                          | 708                                                  | 200                                    | 50                                                              |
| <b>Total</b>   | <b>48776</b>                      | <b>17813</b>                                 | <b>17852</b>                                         | <b>2558</b>                            | <b>2143</b>                                                     |

813 <sup>a</sup>Number of registered animals determined by pedigree analysis to be fullblood for breed  
814 associations with open herdbooks.

815 <sup>b</sup>Number of registered animals assigned to their identified breed with  $P \geq 0.97$  by  
816 fastSTRUCTURE in preliminary analyses and retained for subsequent analyses.

817 <sup>c</sup>A random sample of 200 individuals was obtained for breeds with  $>200$  individuals after  
818 fastSTRUCTURE analysis and all individuals were sampled for breeds with  $\leq 200$  per breed and  
819 the data were again analyzed by fastSTRUCTURE with  $K=19$  after removal of the Salers.

820 <sup>d</sup>Animals that were determined to not be fullblood by pedigree analysis and animals  
821 assigned with  $P \leq 0.60$  by SNPweights to their breed of registry were removed.

822



823 **Table 2. The number of variants queried by each assay and the number of**  
824 **individuals from the 20 reference breeds genotyped using each assay.**  
825

| <b>Assay</b> | <b>No. of Variants</b> | <b>No. of Registered Individuals</b> |
|--------------|------------------------|--------------------------------------|
| BovineSNP50  | 58336                  | 20485                                |
| BovineHD     | 777962                 | 2303                                 |
| GGP-F250     | 227234                 | 3068                                 |
| GGP-90KT     | 76999                  | 4407                                 |
| GGP-LDV3     | 26504                  | 6065                                 |
| GGP-HDV3     | 139977                 | 3630                                 |
| GGP-LDV4     | 30105                  | 8653                                 |
| GGP-LDV1     | 8762                   | 165                                  |
| Zoetis i50K  | 59825                  | 0                                    |
| ICBF IDBv3   | 53450                  | 0                                    |
| BOVGv1       | 47843                  | 0                                    |
| Total        |                        | 48776                                |

826

827 **Table 3. Number of individuals for each reference breed assigned to their breed of**  
 828 **registration by minimum ancestry threshold.**  
 829

| Breed          | Breed Assignment Probability |      |      |      |      |
|----------------|------------------------------|------|------|------|------|
|                | ≥90%                         | ≥85% | ≥80% | ≥75% | ≥70% |
| Angus          | 51                           | 136  | 184  | 199  | 200  |
| Hereford       | 58                           | 136  | 184  | 200  | 200  |
| Limousin       | 93                           | 127  | 144  | 162  | 173  |
| Charolais      | 52                           | 92   | 119  | 132  | 147  |
| Simmental      | 21                           | 43   | 81   | 103  | 121  |
| Japanese Black | 52                           | 73   | 78   | 83   | 86   |
| Braunvieh      | 37                           | 57   | 63   | 65   | 68   |
| Gelbvieh       | 23                           | 31   | 39   | 43   | 43   |
| Romagnola      | 10                           | 25   | 32   | 36   | 37   |
| Shorthorn      | 34                           | 98   | 159  | 170  | 177  |
| Red Angus      | 48                           | 88   | 110  | 120  | 123  |
| Holstein       | 39                           | 119  | 172  | 193  | 196  |
| Jersey         | 52                           | 77   | 91   | 108  | 116  |
| Brown Swiss    | 38                           | 64   | 73   | 82   | 86   |
| Guernsey       | 12                           | 22   | 29   | 30   | 30   |
| N'Dama         | 27                           | 45   | 59   | 59   | 59   |
| Brahman        | 15                           | 40   | 50   | 50   | 50   |
| Nelore         | 32                           | 50   | 50   | 50   | 50   |
| Total          | 694                          | 1323 | 1717 | 1885 | 1962 |

830

831 **Table 4. Ancestry proportion statistics for the self-assignment of reference panel**  
 832 **members from samples of  $\leq 50$  or  $\leq 100$  individuals from the candidate reference**  
 833 **breed individuals.**

834

| <b>Breed</b>              | <b>Min %<br/>(<math>\leq 50</math>)</b> | <b>Avg %<br/>(<math>\leq 50</math>)</b> | <b>Max %<br/>(<math>\leq 50</math>)</b> | <b>Min %<br/>(<math>\leq 100</math>)</b> | <b>Avg %<br/>(<math>\leq 100</math>)</b> | <b>Max %<br/>(<math>\leq 100</math>)</b> |
|---------------------------|-----------------------------------------|-----------------------------------------|-----------------------------------------|------------------------------------------|------------------------------------------|------------------------------------------|
| Angus                     | 86.22                                   | 90.40                                   | 95.54                                   | 78.49                                    | 87.05                                    | 94.13                                    |
| Hereford                  | 79.75                                   | 90.08                                   | 95.05                                   | 73.41                                    | 87.39                                    | 96.81                                    |
| Limousin                  | 69.52                                   | 88.53                                   | 98.16                                   | 18.36                                    | 86.40                                    | 98.81                                    |
| Charolais                 | 78.14                                   | 90.19                                   | 99.82                                   | 48.93                                    | 77.46                                    | 93.96                                    |
| Simmental                 | 81.06                                   | 90.37                                   | 97.66                                   | 61.36                                    | 73.05                                    | 88.11                                    |
| Japanese Black            | 81.44                                   | 90.00                                   | 97.07                                   | 24.51                                    | 86.50                                    | 98.95                                    |
| Braunvieh                 | 71.59                                   | 89.46                                   | 98.61                                   | 65.46                                    | 88.36                                    | 98.70                                    |
| Gelbvieh                  | 73.03                                   | 76.27                                   | 81.63                                   | 60.92                                    | 74.59                                    | 80.33                                    |
| Romagnola                 | 75.05                                   | 87.18                                   | 96.66                                   | 74.79                                    | 85.99                                    | 95.12                                    |
| Shorthorn                 | 84.42                                   | 88.69                                   | 94.54                                   | 70.71                                    | 85.27                                    | 96.35                                    |
| Red Angus                 | 79.00                                   | 89.60                                   | 96.33                                   | 68.07                                    | 86.83                                    | 97.38                                    |
| Holstein                  | 85.82                                   | 90.30                                   | 97.51                                   | 62.95                                    | 86.97                                    | 97.81                                    |
| Jersey                    | 78.55                                   | 89.28                                   | 95.93                                   | 61.23                                    | 86.54                                    | 97.18                                    |
| Brown Swiss               | 80.10                                   | 89.22                                   | 96.40                                   | 61.68                                    | 86.02                                    | 98.42                                    |
| Guernsey                  | 79.53                                   | 89.19                                   | 95.85                                   | 77.40                                    | 88.31                                    | 94.36                                    |
| N'Dama                    | 80.67                                   | 89.25                                   | 96.90                                   | 78.91                                    | 87.78                                    | 95.67                                    |
| <i>Bos taurus indicus</i> | 87.83                                   | 91.91                                   | 97.75                                   | 81.43                                    | 89.79                                    | 97.60                                    |

835

836 **Table 5. Average predicted ancestry and variance in predicted ancestry for**  
 837 **candidate reference breed individuals when filtered on minimum predicted**  
 838 **ancestry.**  
 839

| Breed                     | Avg %<br>(70%) | Var<br>(70%) | Avg %<br>(75%) | Var<br>(75%) | Avg %<br>(80%) | Var<br>(80%) | Avg %<br>(85%) | Var<br>(85%) | Avg %<br>(90%) | Var<br>(90%) |
|---------------------------|----------------|--------------|----------------|--------------|----------------|--------------|----------------|--------------|----------------|--------------|
| Angus                     | 86.50          | 0.21         | 87.95          | 0.19         | 87.33          | 0.22         | 88.86          | 0.13         | 72.34          | 0.97         |
| Hereford                  | 86.99          | 0.22         | 87.09          | 0.23         | 87.48          | 0.19         | 88.25          | 0.13         | 84.62          | 0.43         |
| Limousin                  | 86.77          | 0.55         | 89.03          | 0.44         | 87.92          | 0.38         | 88.48          | 0.43         | 80.62          | 1.19         |
| Charolais                 | 80.18          | 2.16         | 85.03          | 1.77         | 86.28          | 0.99         | 88.56          | 0.52         | 81.54          | 0.76         |
| Simmental                 | 72.73          | 0.89         | 78.45          | 0.58         | 83.81          | 0.36         | 89.65          | 0.15         | 87.82          | 0.50         |
| Japanese Black            | 87.85          | 0.52         | 88.04          | 0.39         | 88.46          | 0.27         | 88.74          | 0.21         | 80.06          | 0.61         |
| Braunvieh                 | 87.01          | 0.37         | 87.84          | 0.36         | 87.33          | 0.38         | 88.71          | 0.21         | 80.47          | 1.24         |
| Gelbvieh                  | 86.68          | 0.41         | 87.10          | 0.43         | 87.52          | 0.34         | 88.43          | 0.34         | 83.31          | 1.25         |
| Romagnola                 | 86.16          | 0.33         | 86.37          | 0.32         | 87.16          | 0.32         | 86.22          | 0.29         | 86.38          | 1.16         |
| Shorthorn                 | 85.97          | 0.26         | 87.03          | 0.22         | 86.80          | 0.14         | 87.38          | 0.07         | 83.00          | 0.70         |
| Red Angus                 | 86.41          | 0.53         | 87.08          | 0.48         | 87.40          | 0.35         | 87.46          | 0.23         | 23.37          | 0.66         |
| Holstein                  | 86.44          | 0.27         | 87.82          | 0.21         | 87.54          | 0.13         | 88.77          | 0.12         | 79.71          | 0.61         |
| Jersey                    | 87.01          | 0.46         | 86.93          | 0.44         | 87.86          | 0.24         | 87.98          | 0.27         | 80.52          | 0.71         |
| Brown Swiss               | 86.22          | 0.47         | 86.73          | 0.51         | 88.24          | 0.26         | 88.11          | 0.20         | 82.23          | 0.70         |
| Guernsey                  | 86.46          | 0.23         | 87.64          | 0.19         | 87.50          | 0.25         | 88.02          | 0.51         | 80.43          | 2.36         |
| N'Dama                    | 87.76          | 0.19         | 87.91          | 0.21         | 87.89          | 0.15         | 89.25          | 0.17         | 86.40          | 0.52         |
| <i>Bos taurus indicus</i> | 87.68          | 0.07         | 88.24          | 0.09         | 87.55          | 0.11         | 88.53          | 0.09         | 84.89          | 0.38         |
| Average                   | 85.58          | 0.48         | 86.84          | 0.41         | 87.30          | 0.30         | 88.32          | 0.24         | 78.69          | 0.87         |

840  
841

842 **Table 6. Average breed ancestry percentages assigned to American Breed**  
 843 **individuals.**  
 844

| <b>Breed</b>              | <b>Avg. Ancestry<br/>Beefmaster %<br/>(± st. dev)</b> | <b>Avg. Ancestry<br/>Brangus %<br/>(± st. dev)</b> | <b>Avg. Ancestry<br/>Santa Gertrudis %<br/>(± st. dev)</b> |
|---------------------------|-------------------------------------------------------|----------------------------------------------------|------------------------------------------------------------|
| Angus                     | 3.29 (± 4.27)                                         | 32.15 (± 8.96)                                     | 4.90 (± 4.48)                                              |
| Hereford                  | 16.13 (± 2.83)                                        | 2.03 (± 2.93)                                      | 2.50 (± 4.05)                                              |
| Limousin                  | 1.40 (± 2.28)                                         | 1.73 (± 2.56)                                      | 1.29 (± 2.19)                                              |
| Charolais                 | 6.89 (± 3.97)                                         | 2.07 (± 3.79)                                      | 5.26 (± 3.42)                                              |
| Simmental                 | 2.65 (± 3.12)                                         | 1.16 (± 2.92)                                      | 0.40 (± 1.40)                                              |
| Japanese Black            | 0.53 (± 3.46)                                         | 0.10 (± 0.63)                                      | 0.22 (± 0.89)                                              |
| Braunvieh                 | 0.63 (± 1.64)                                         | 0.33 (± 1.29)                                      | 0.59 (± 1.63)                                              |
| Gelbvieh                  | 3.19 (± 3.30)                                         | 3.14 (± 3.67)                                      | 2.59 (± 3.20)                                              |
| Romagnola                 | 1.05 (± 1.94)                                         | 0.54 (± 1.39)                                      | 0.68 (± 1.57)                                              |
| Shorthorn                 | 15.36 (± 4.72)                                        | 5.86 (± 3.42)                                      | 37.71 (± 5.46)                                             |
| Red Angus                 | 3.66 (± 3.57)                                         | 13.60 (± 3.95)                                     | 1.18 (± 3.46)                                              |
| Holstein                  | 6.22 (± 6.73)                                         | 4.53 (± 4.82)                                      | 0.89 (± 2.83)                                              |
| Jersey                    | 0.73 (± 1.65)                                         | 0.52 (± 1.37)                                      | 0.26 (± 1.08)                                              |
| Brown Swiss               | 1.05 (± 2.14)                                         | 1.28 (± 2.26)                                      | 0.73 (± 1.81)                                              |
| Guernsey                  | 1.53 (± 2.20)                                         | 0.17 (± 0.81)                                      | 1.50 (± 2.14)                                              |
| N'Dama                    | 0.52 (± 1.35)                                         | 0.19 (± 0.87)                                      | 0.16 (± 0.76)                                              |
| <i>Bos taurus indicus</i> | 27.32 (± 4.84)                                        | 23.09 (± 6.73)                                     | 30.50 (± 4.52)                                             |

845  
 846

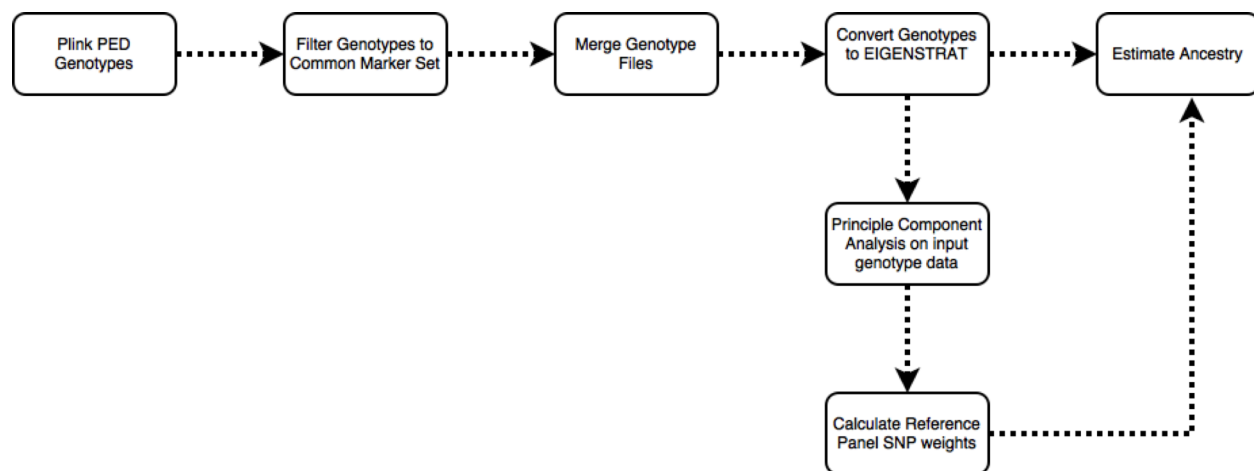

**Fig. 1** Flow diagram of the breed composition pipeline.

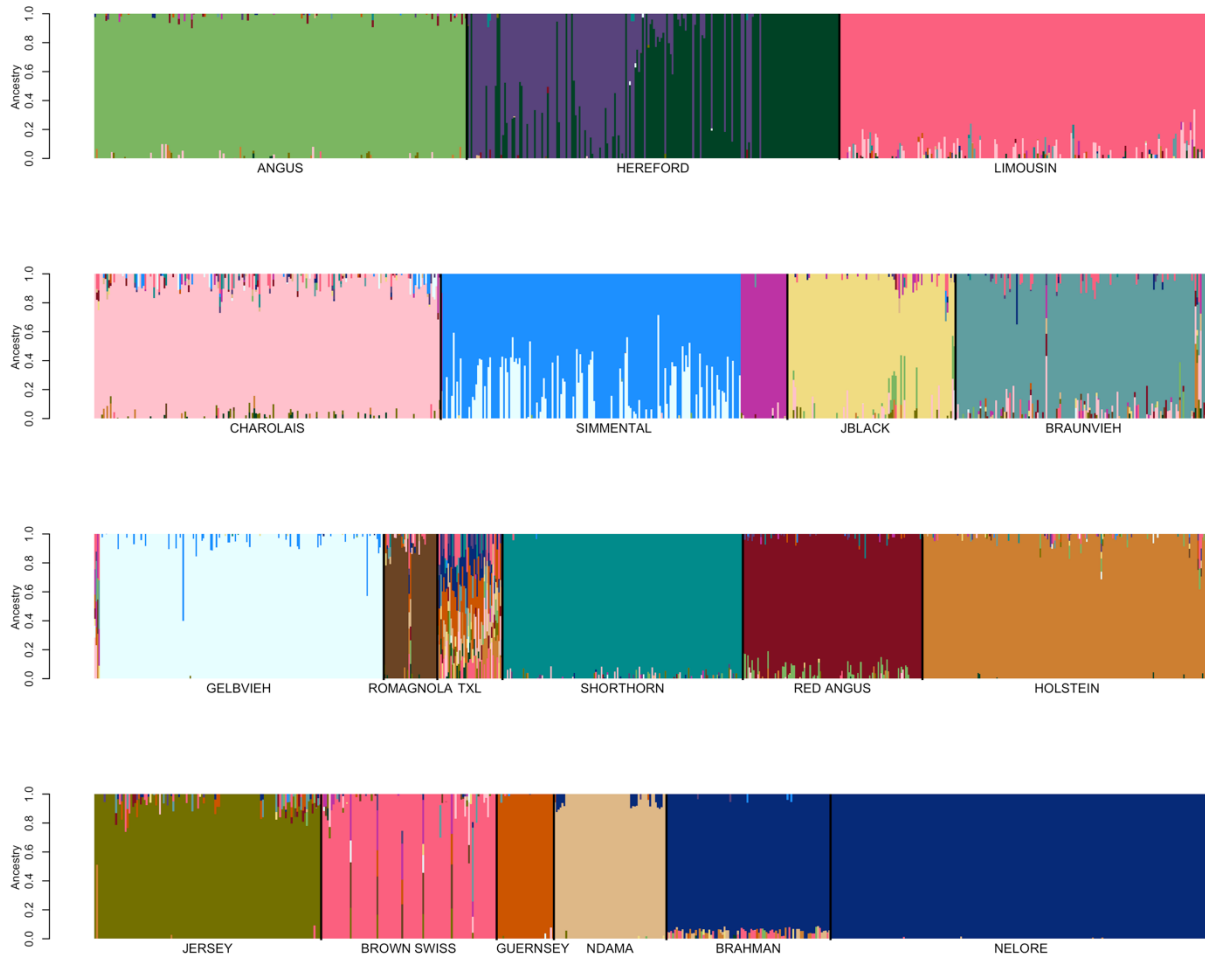

**Fig. 2** FastSTRUCTURE results for a random sample of  $\leq 200$  individuals per breed from the pool of 17,852 potential reference individuals at  $K=19$ . Breed identification is shown below each colored block and each animal is represented as a vertical line within the block.

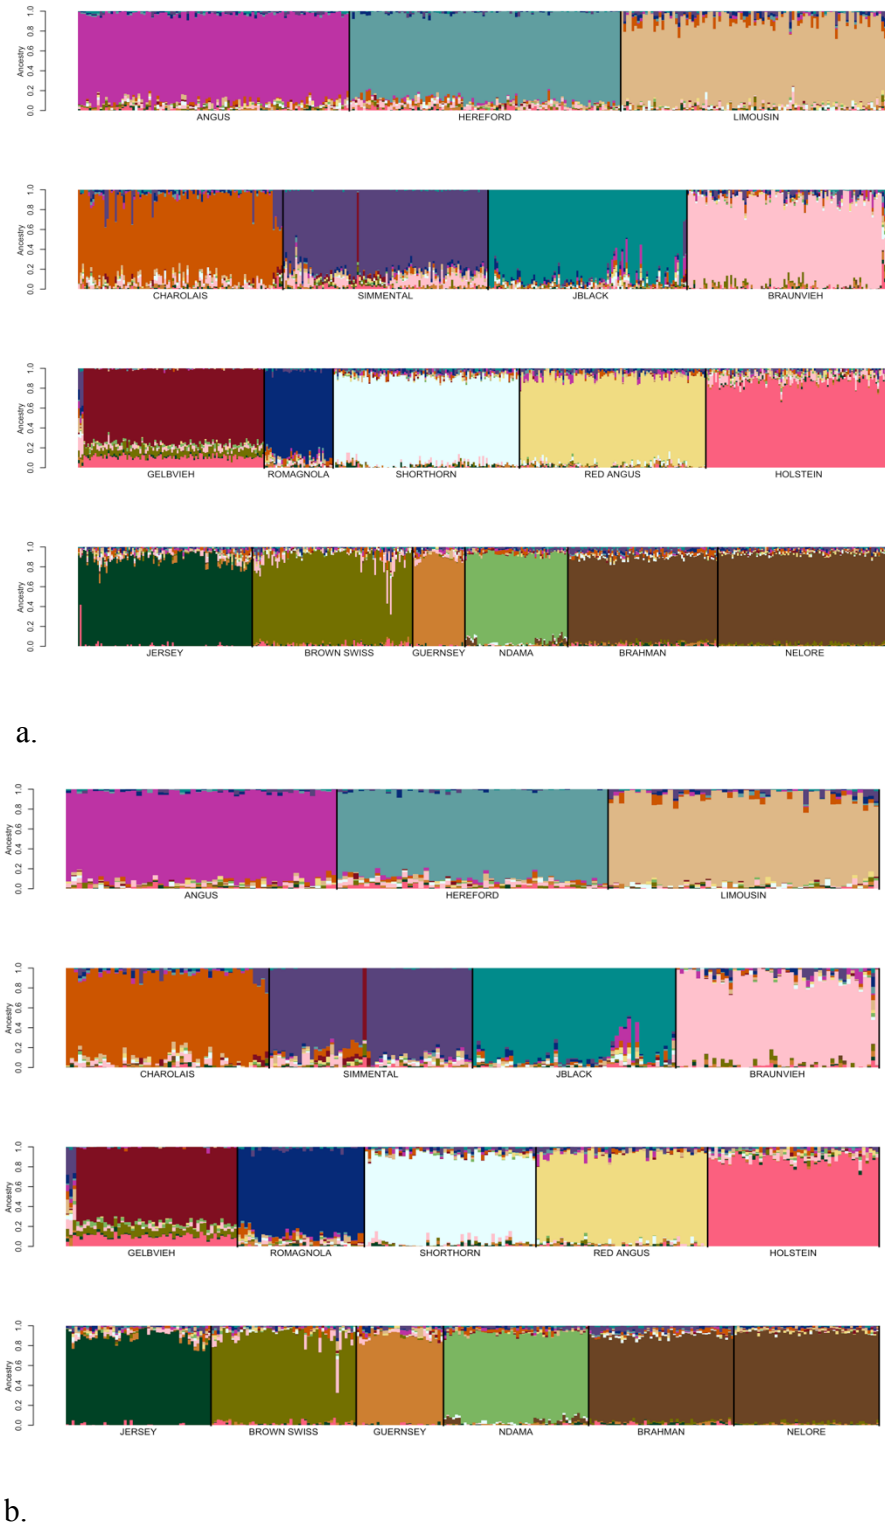

**Fig. 3** SNPweights self-assignment analysis results for reference panel sample sets consisting of: (a)  $\leq 100$  individuals per breed, or (b)  $\leq 50$  individuals per breed. Seven individuals were filtered for  $\leq 60\%$  ancestry to their breed of registry (Holstein  $n=3$ , Jersey  $n=1$ , Japanese Black  $n=3$ ).



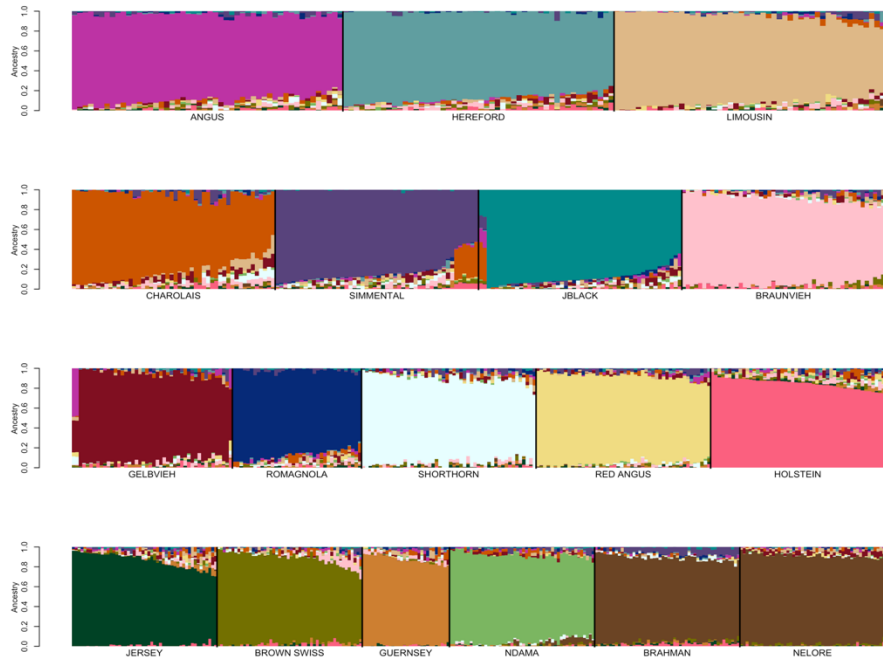

a.

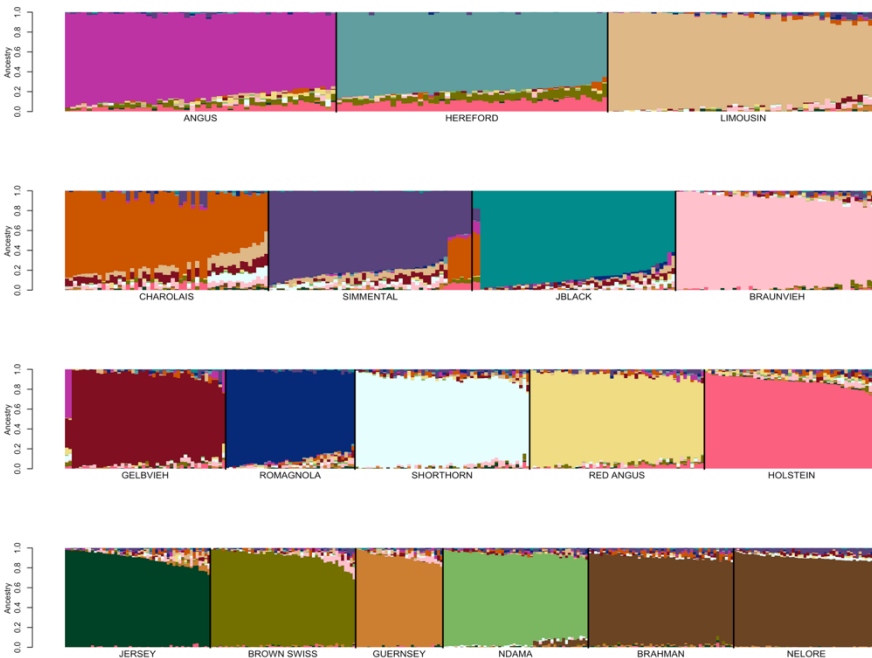

b.

**Fig. 4** SNPweights self-assignment of ancestry for candidate reference breed individuals following evaluation of open herdbook breeds using: (a) the BC7K, or (b) the BC13K marker panels. Reference breed panels were constructed by random sampling  $\leq 50$  individuals per breed and SNP weights were estimated using the BC7K and BC13K marker sets.

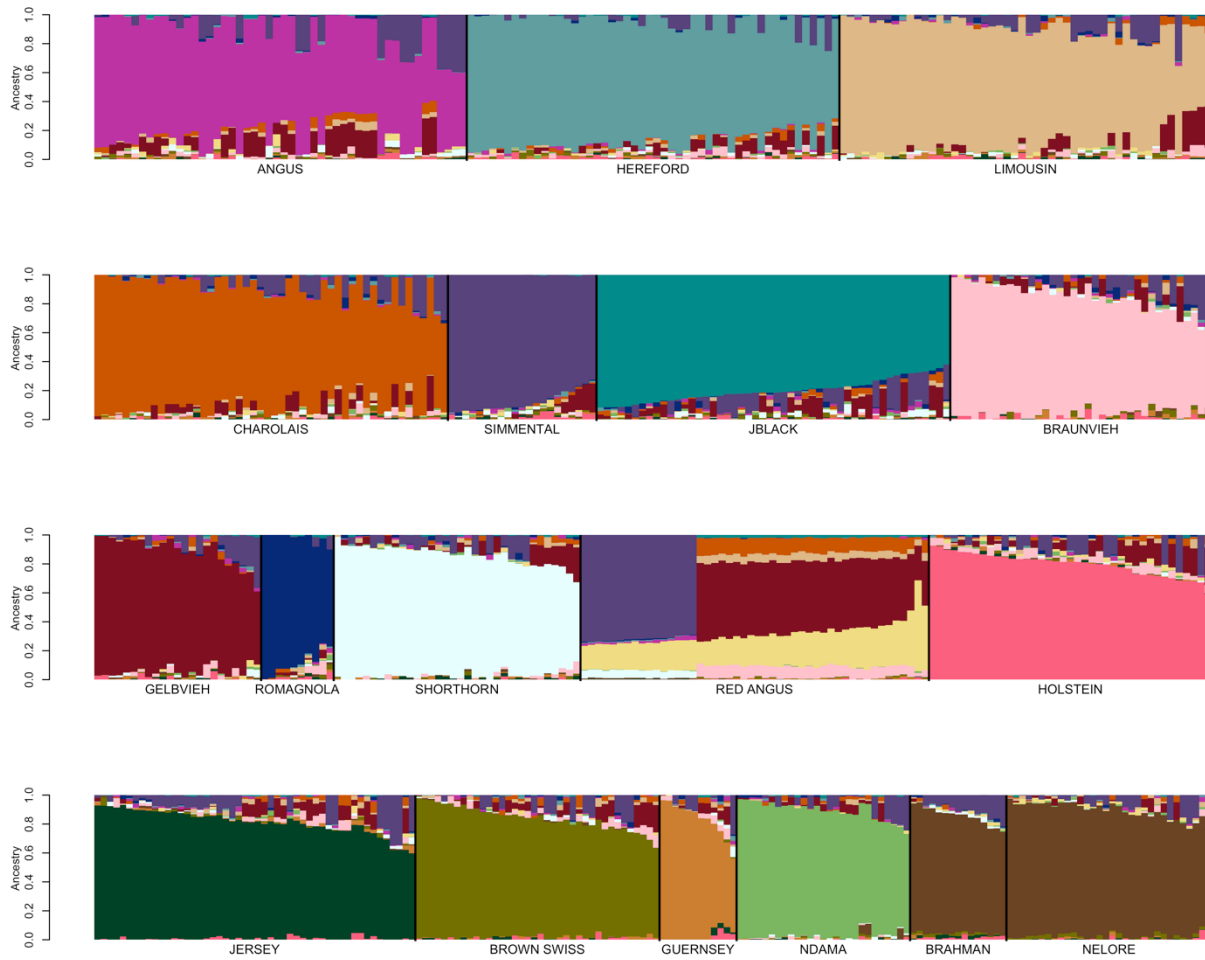

**Fig. 5** Reference breed panel constructed by the random sampling of  $\leq 50$  individuals per breed from individuals with  $\geq 90\%$  ancestry was self-assigned to reference breed ancestry using the BC7K marker set.

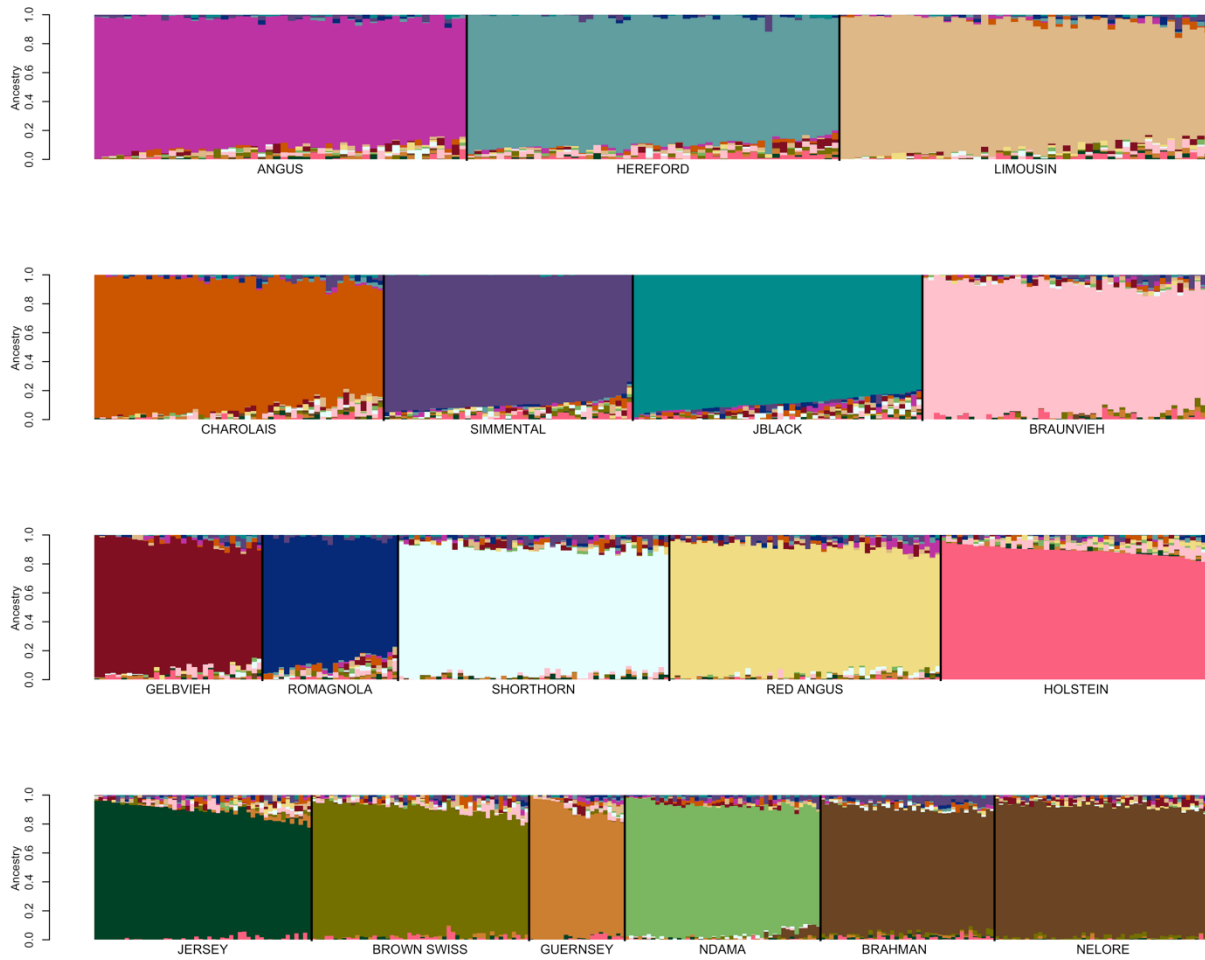

**Fig. 6** Reference breed panel constructed by the random sampling of  $\leq 50$  individuals per breed from individuals with  $\geq 85\%$  ancestry was self-assigned to reference breed ancestry using the BC7K marker set.

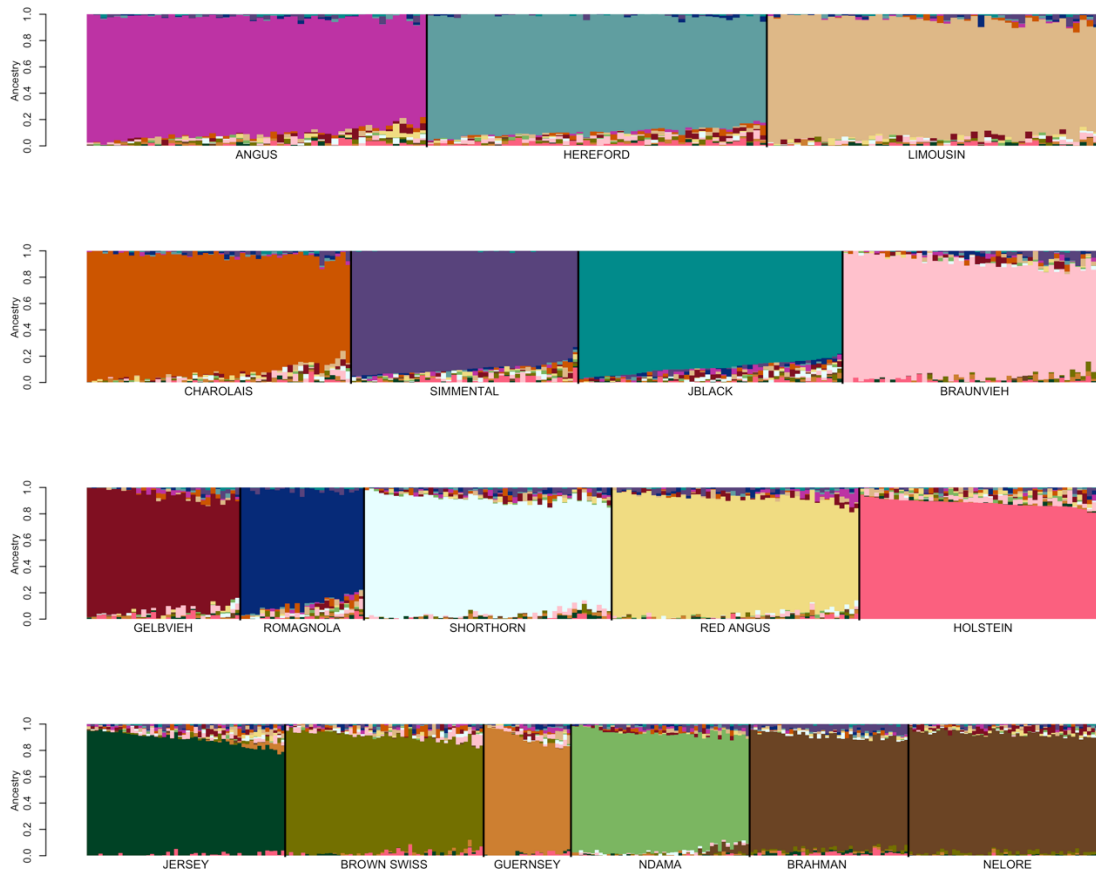

**Fig. 7** Reference breed panel constructed by the independent random sampling of a second sample of  $\leq 50$  individuals per breed from individuals with  $\geq 85\%$  ancestry after eliminating individuals represented in the first sample was self-assigned to reference breed ancestry using the BC7K marker set.

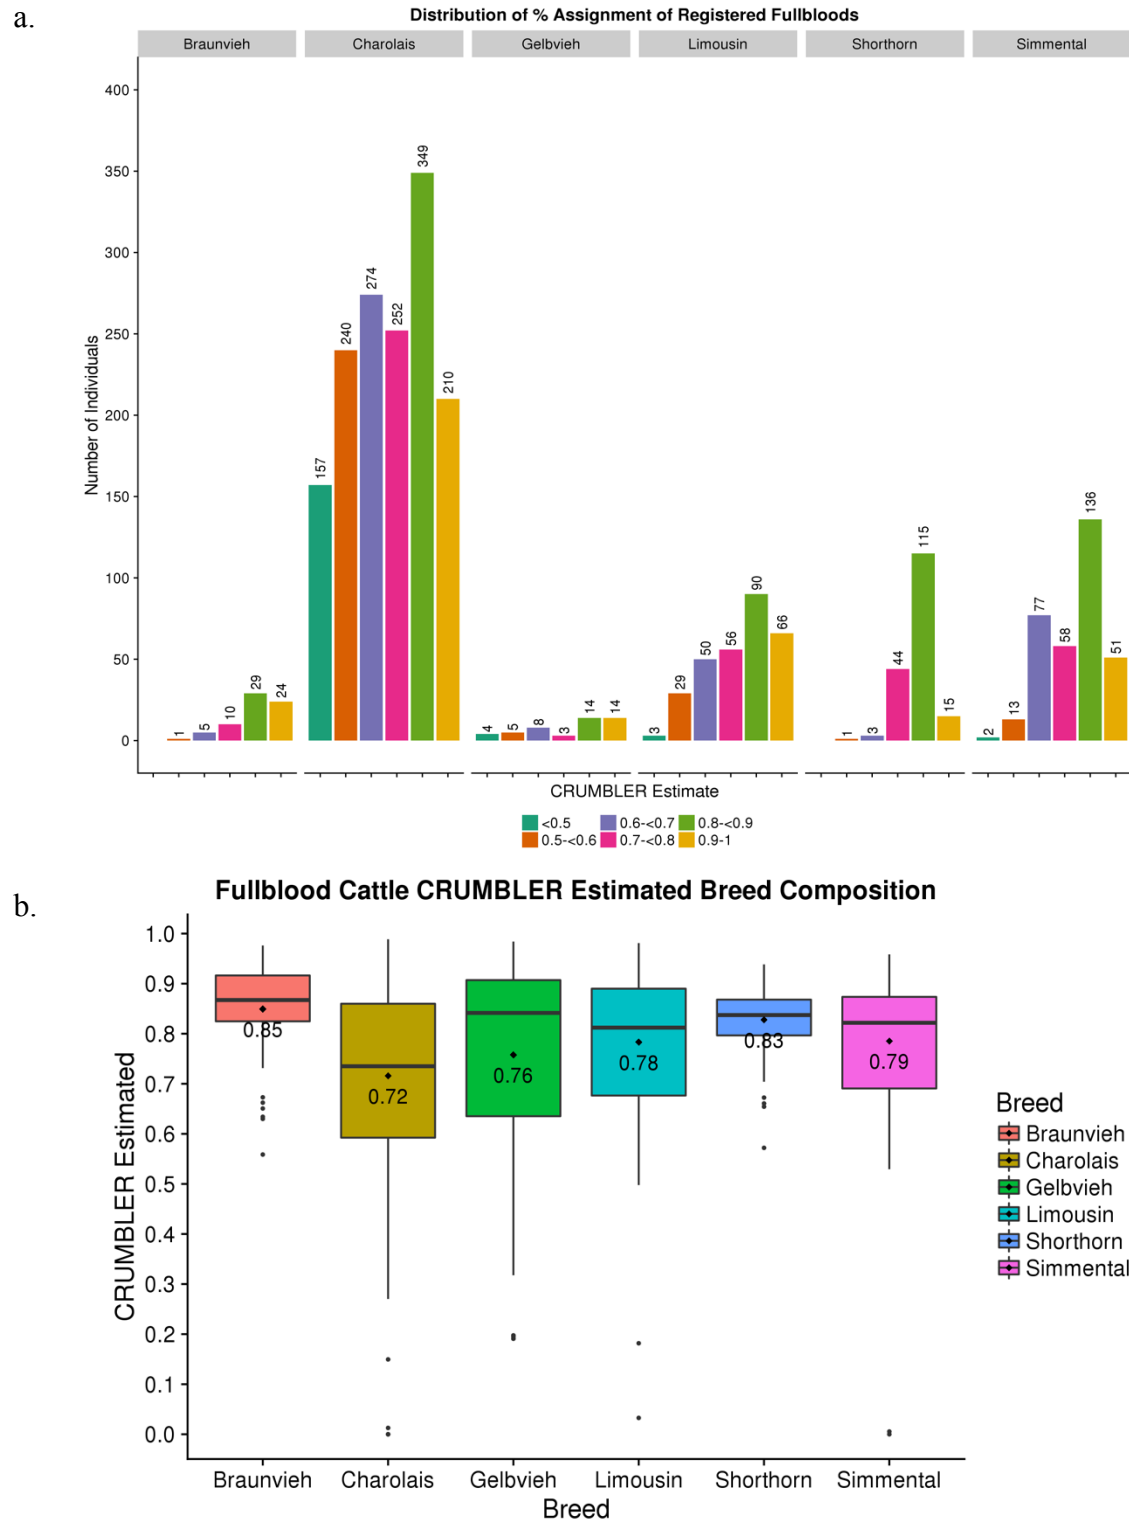

**Fig. 8** (a) Distribution by breed of SNPweights ancestry assignment results for 2,408 registered fullblood animals from open herd book breeds. (b) Pictorial representation of CRUMBLER estimates for 2,408 registered fullblood animals from open herd book breeds.

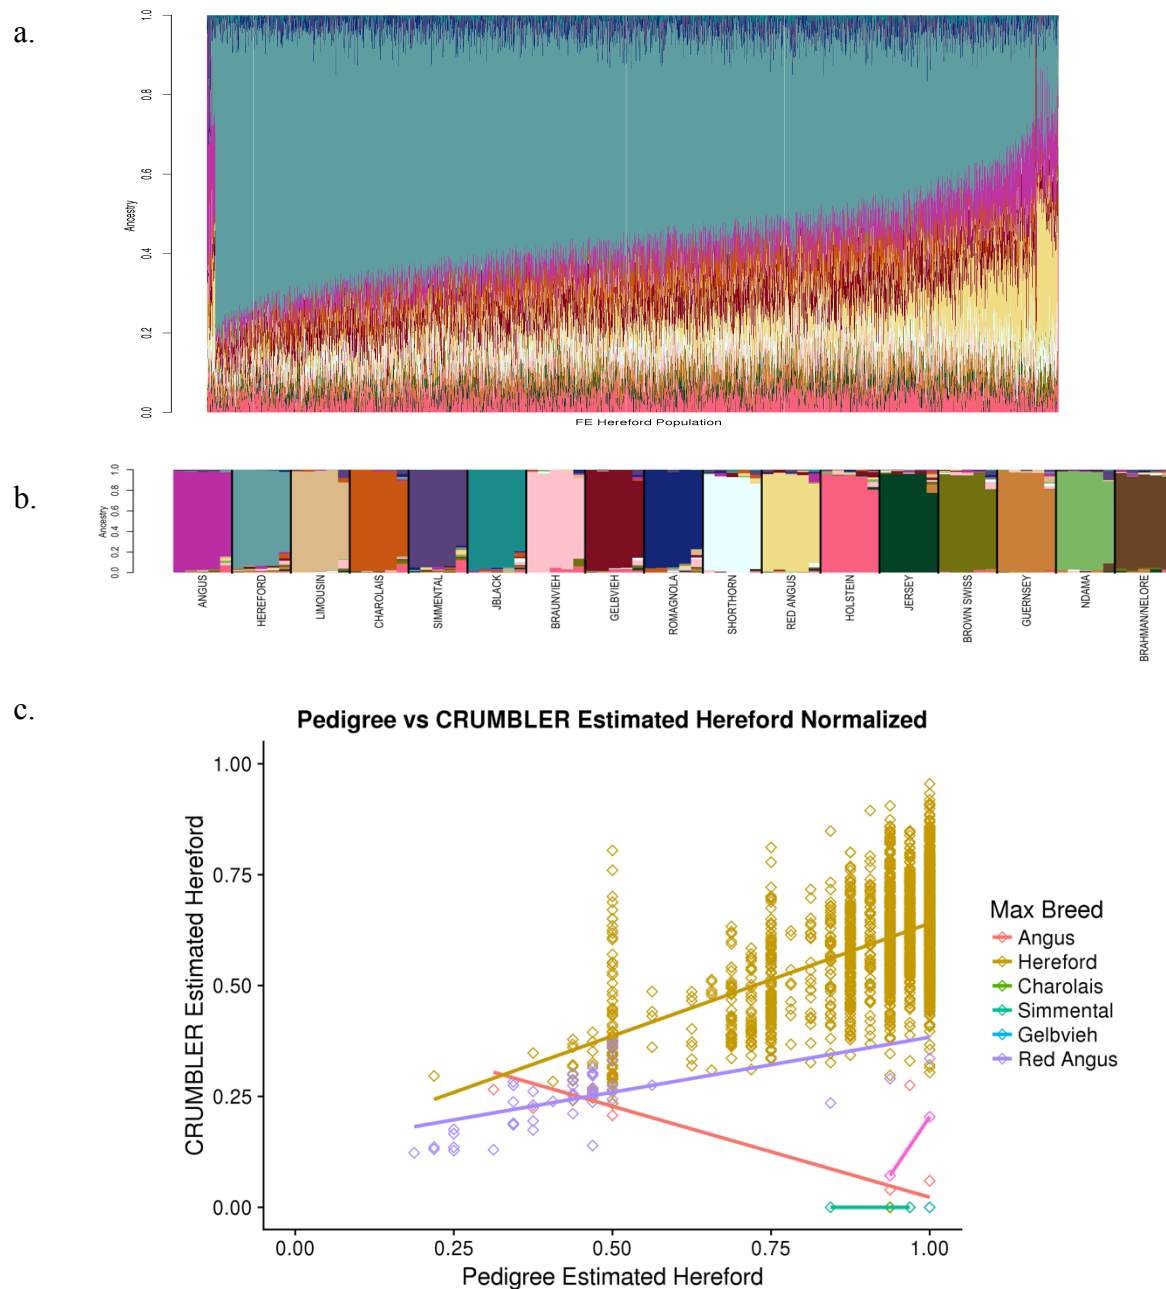

**Fig. 9** (a) SNPweights ancestry results for 2,005 crossbred Hereford individuals with *a-priori* breed composition estimates determined by pedigree. (b) Breed assignment reference breed key. (c) Hereford SNPweights estimated proportions using CRUMBLER are plotted against the pedigree estimates. Data point color indicates the breed for which SNPweights assigned the highest proportion for each individual.

a.

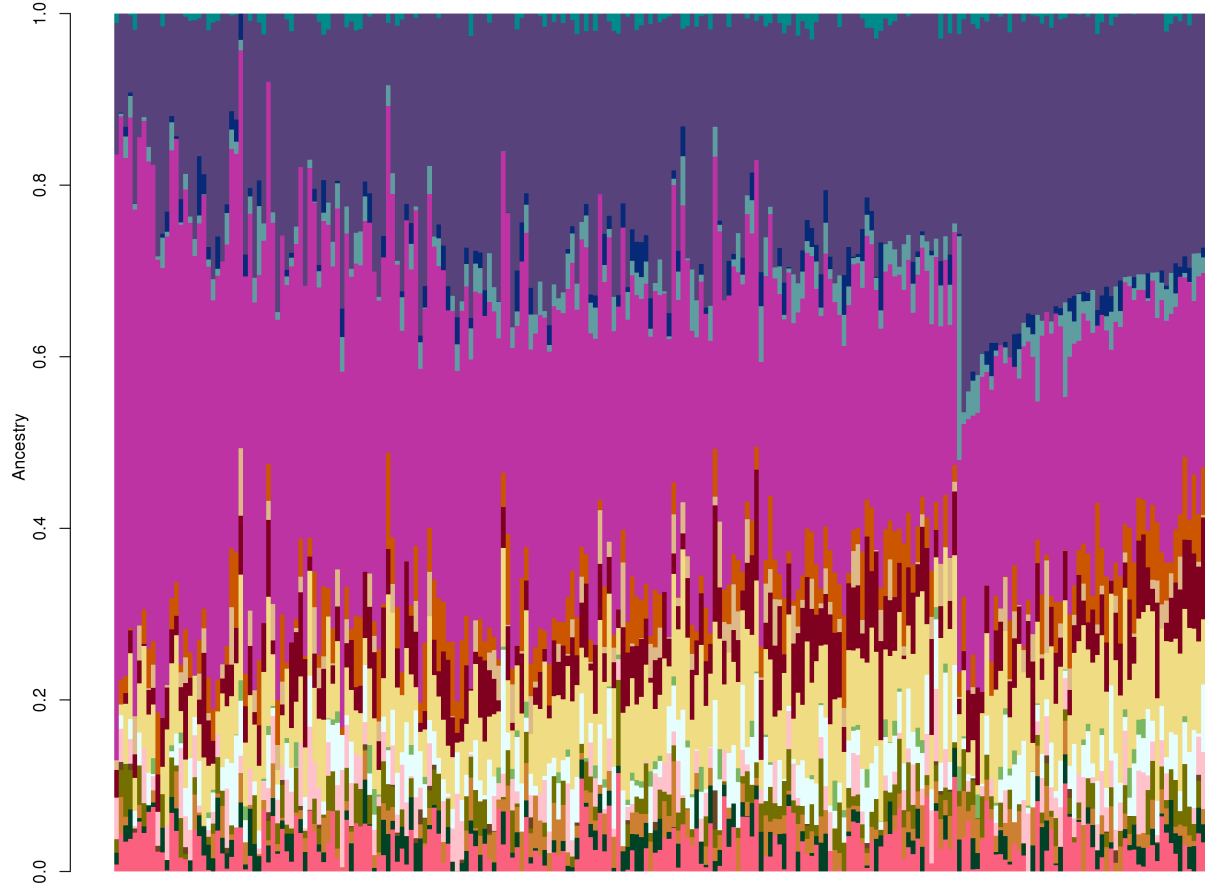

b.

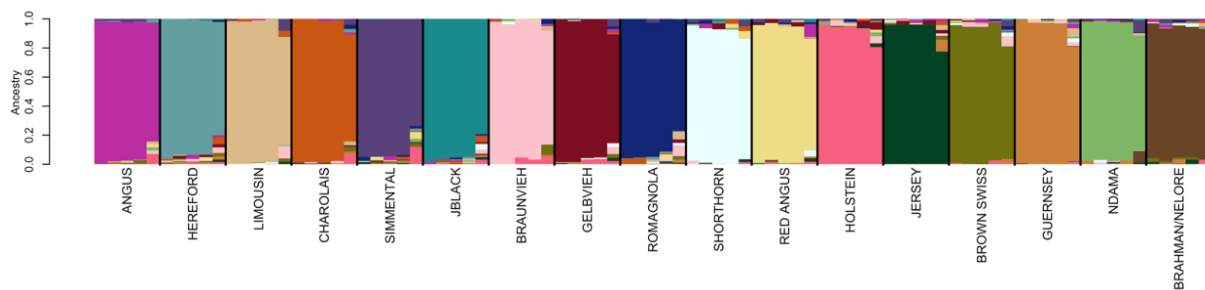

**Fig. 10** (a) SNPweights ancestry results for 238 crossbred individuals with *a-priori* breed composition estimates of 50% Angus and 50% Simmental based on a reference panel with  $\leq 50$  individuals per breed sampled from individuals with  $\geq 85\%$  assignment to their breed of registry. (b) Breed assignment for the crossbred individuals can be determined using this reference breed key.

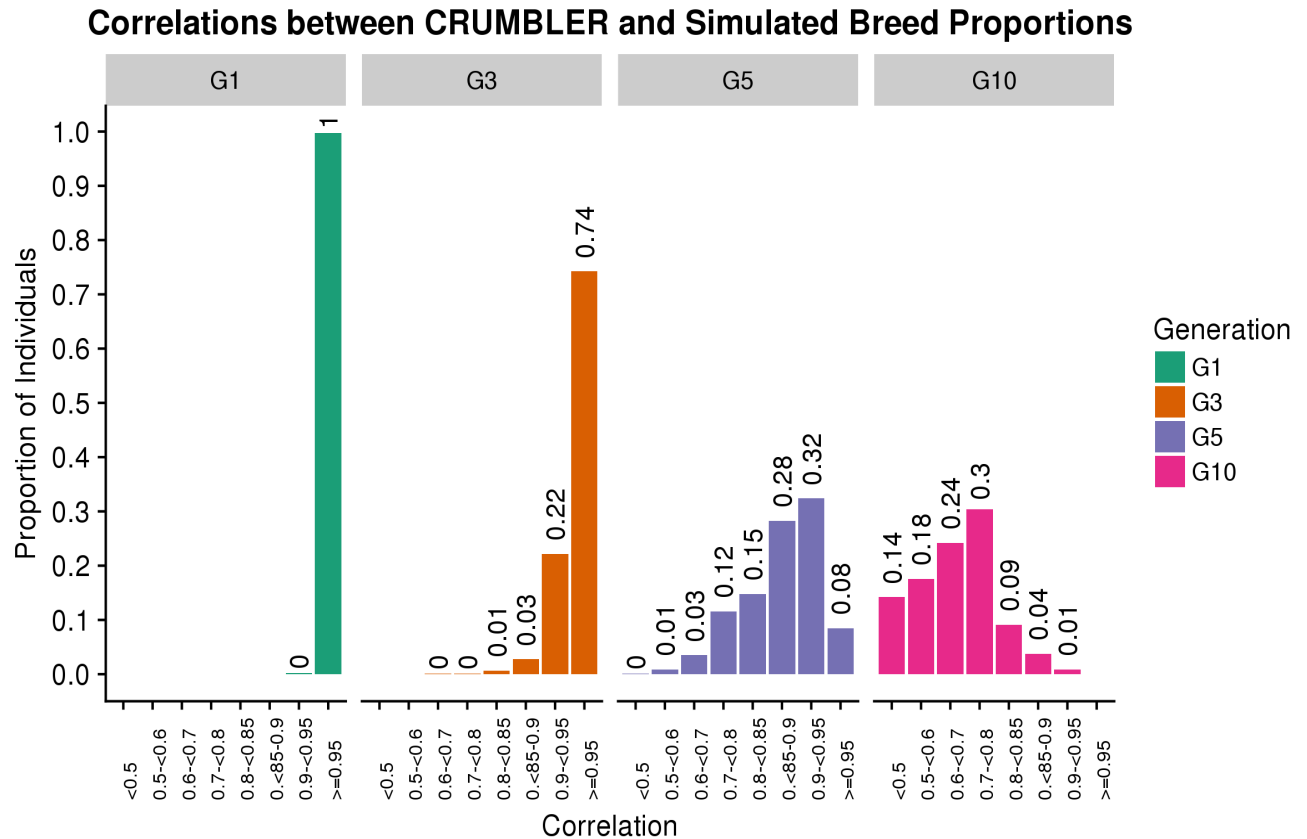

**Fig. 11** Genotypes were simulated for the indicated number of generations of random mating, with generation 1 (G1) animals being 50:50 proportion except when two parents from the same breed were mated. SNPweights results were obtained using CRUMBLER pipeline parameters correlations between these estimates and the known simulated breed compositions were produced and the proportion of individuals within each correlation class is indicated.



a.

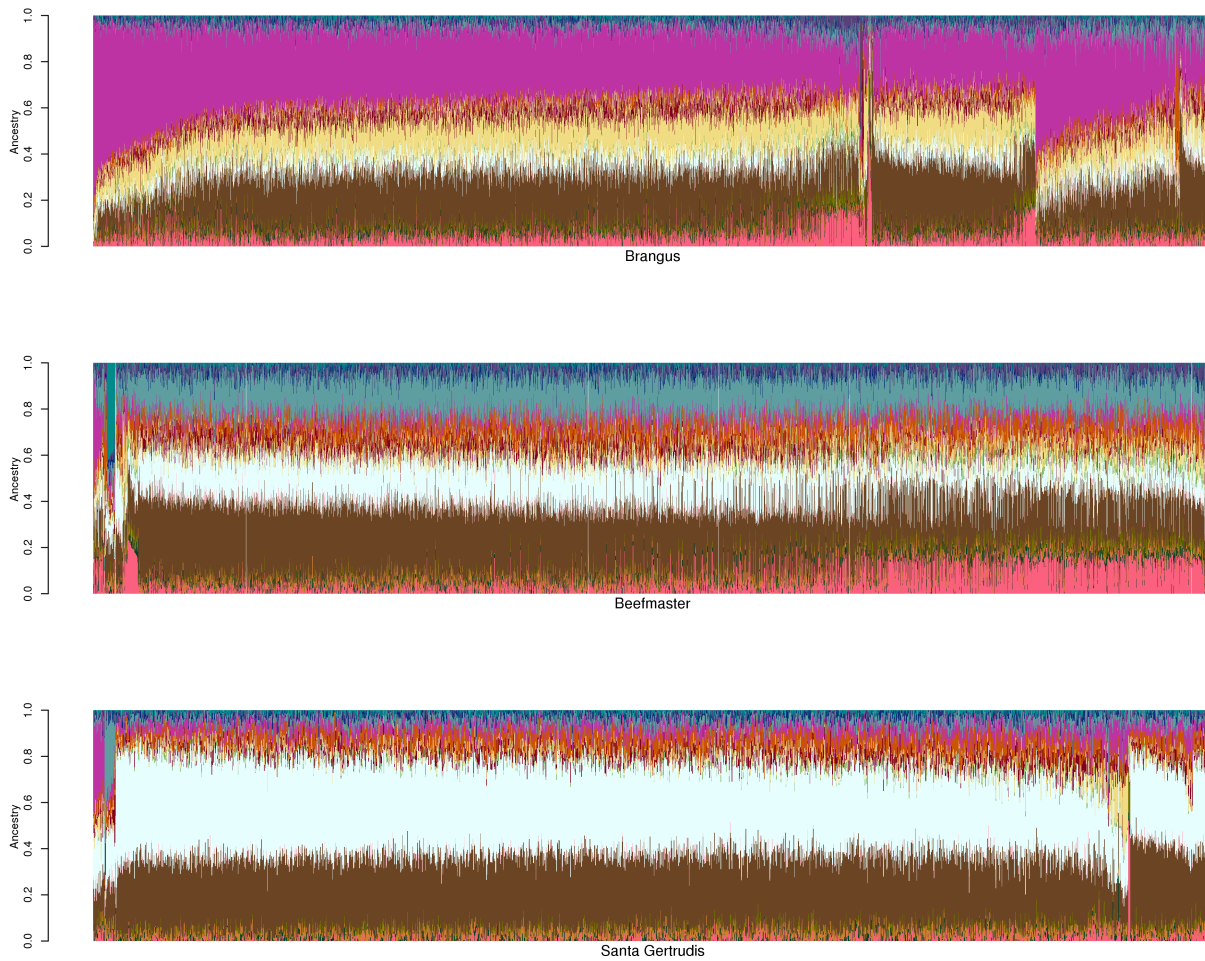

b.

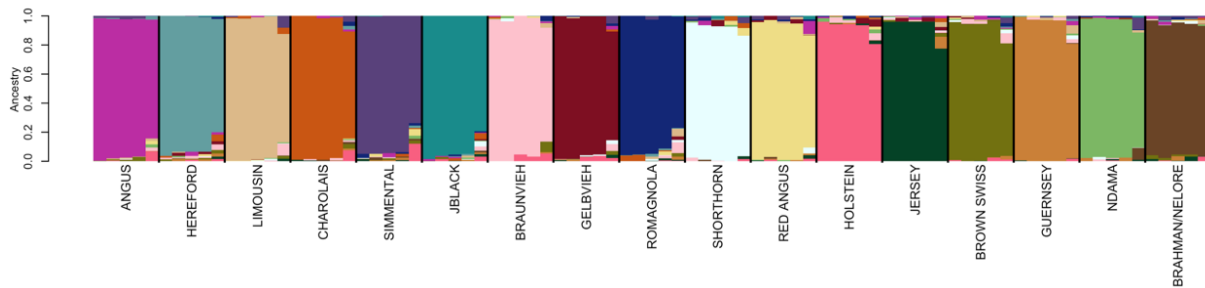

**Fig. 12** (a) SNPweights ancestry results using CRUMBLER pipeline for 11,362 Brangus, 3,832 Beefmaster, and 2,010 Santa Gertrudis individuals. (b) Breed assignment for these advanced generation composite animals can be determined using this reference breed key.

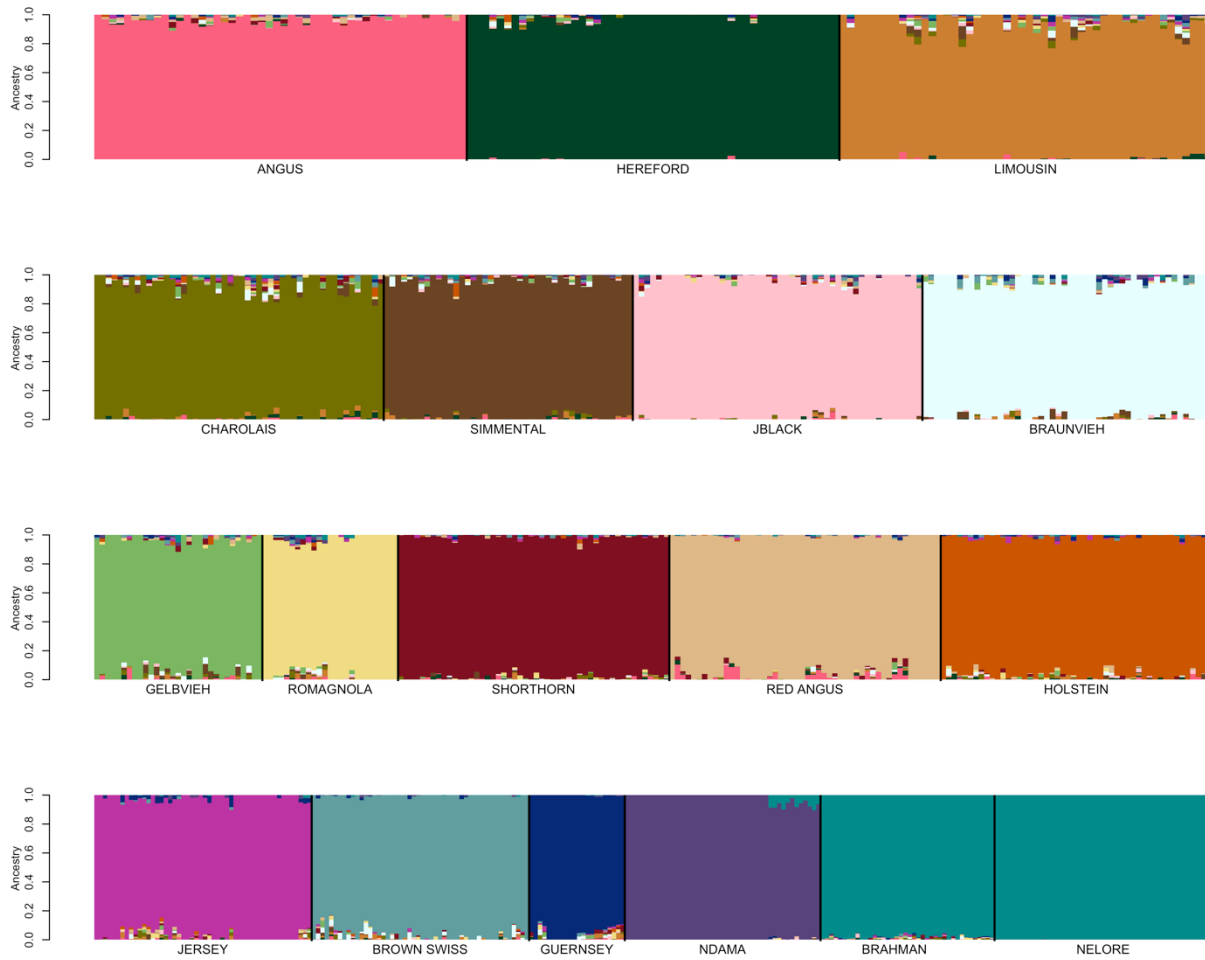

**Fig. 13** Self-assignment of ancestry for the animals in the reference breed set formed with  $\leq 50$  individuals per breed from the individuals that had  $\geq 85\%$  assignment to their breed of registration using ADMIXTURE.

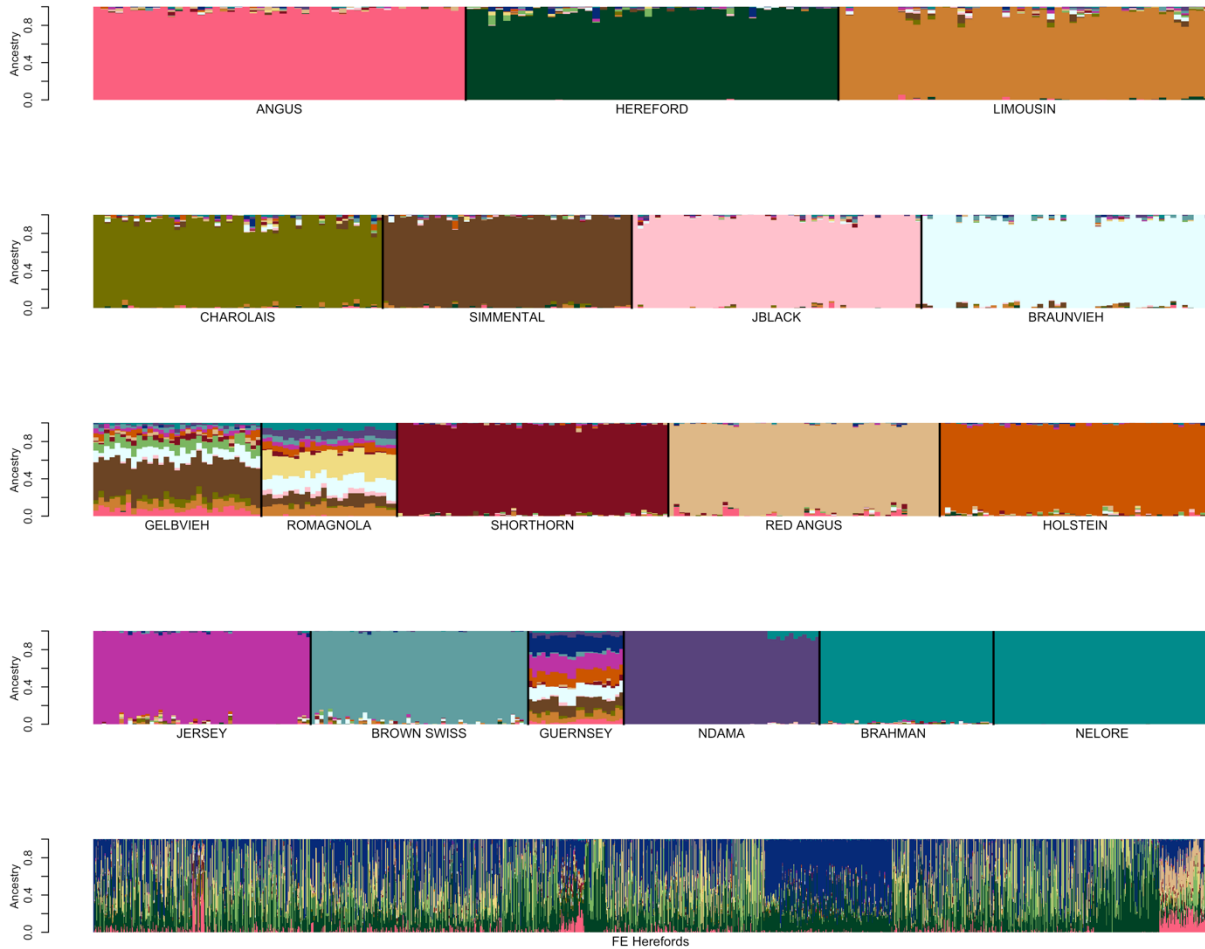

**Fig. 14** ADMIXTURE analysis conducted using the same data as shown in Figure 13 (first four rows), merged with an additional 2,005 high percentage crossbred Hereford target individuals (last row). Here, the 2,005 Hereford crossbred individuals appear after the reference individuals in the input genotype file.

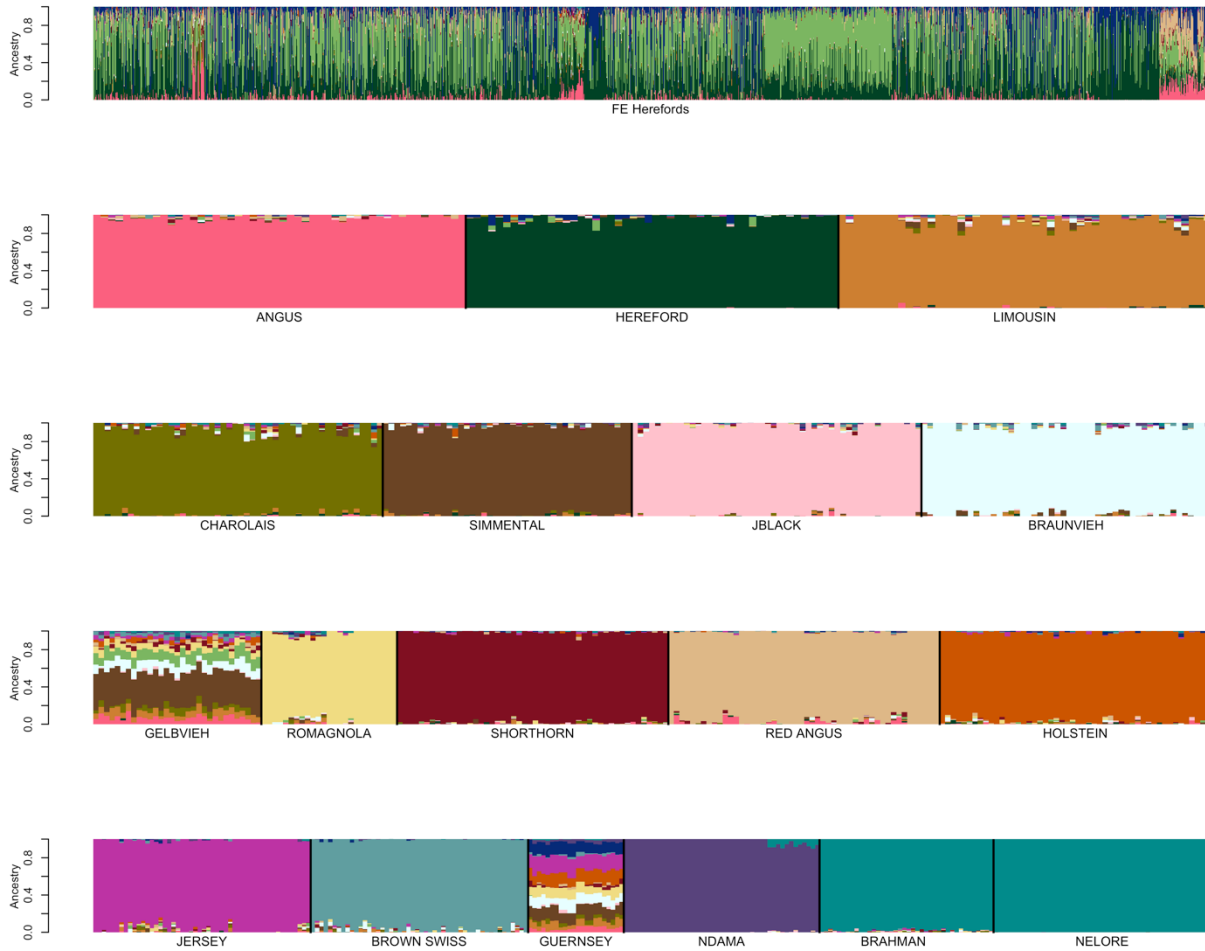

**Fig. 15** ADMIXTURE analysis conducted using the same data as shown in Fig. 14. Here, the 2,005 Hereford crossbred individuals appear before the reference individuals in the input genotype file. The first row represents the 2005 Hereford crossbred samples. Rows 2 to 5 show the reference panel individuals.

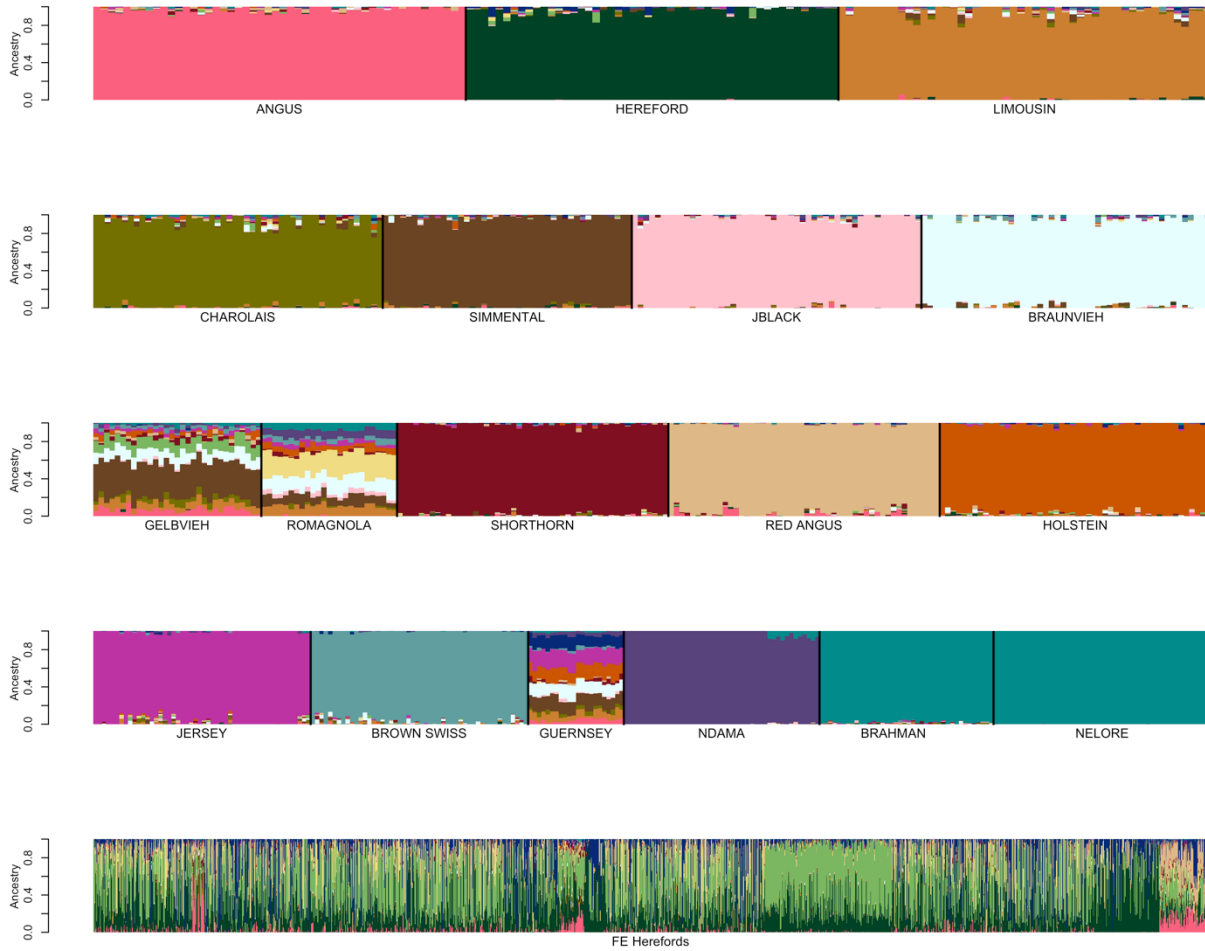

**Fig. 16** ADMIXTURE analysis conducted using the same data as shown in Figs. 14 and 15, but with the order of the individuals in the input genotype file randomized. The animals were sorted following analyses to generate this figure where the first four rows represent the reference panel individuals, the fifth row shows the 2,005 Hereford crossbred animals.

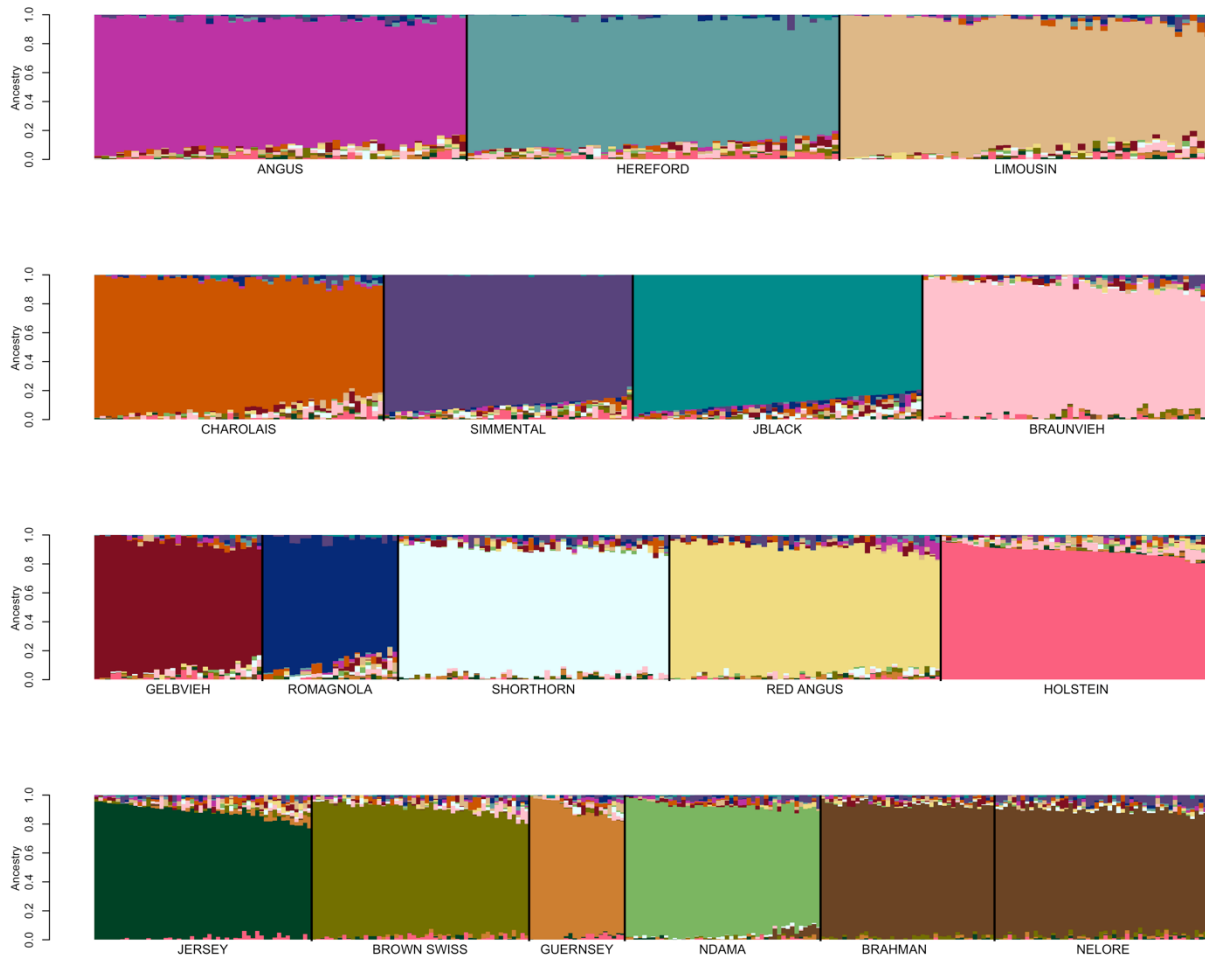

**Fig. 17** Reference breed panel constructed by the random sampling of  $\leq 50$  individuals per breed from individuals with  $\geq 85\%$  ancestry was self-assigned to reference breed ancestry using the BC6K marker set.
